# Supplementary material for: Forward genetic screen using a gene-breaking trap approach identifies a novel role of grin2bb-associated RNA transcript (grin2bbART) in zebrafish heart function
Source: Front Cell Dev Biol. 2024 Mar 8;12:1339292. doi: 10.3389/fcell.2024.1339292 (PMC10964321; doi:10.3389/fcell.2024.1339292)
Supplement: Supplementary file 2 [file Table3.XLSX]

## Sheet: Sheet1
Table S3: Expression of Grin2bb
EnsID	GeneName	bh-/-	bh+/-	log2FC	atrium	bulbus	ventricle
ENSDARG00000030376	grin2bb	7774.76	19537.4	-1.32937	445.105	339.81	54.9018
