# Supplementary material for: Forward genetic screen using a gene-breaking trap approach identifies a novel role of grin2bb-associated RNA transcript (grin2bbART) in zebrafish heart function
Source: Front Cell Dev Biol. 2024 Mar 8;12:1339292. doi: 10.3389/fcell.2024.1339292 (PMC10964321; doi:10.3389/fcell.2024.1339292)
Supplement: Supplementary file 9 [file Table6.XLSX]

## Sheet: Sheet1
Category	Term	Count	%	P Value	Genes	List Total	Pop Hits	Pop Total	Fold Enrichment	Bonferroni	Benjamini	FDR
GOTERM_MF_DIRECT	GO:0005509~calcium ion binding	215	4.6078	1.32045e-10	CBLC, JAG1B, JAG1A, HMCN2, DUOX, SYT11B, EHD1B, HABP2, EHD1A, LRP1AA, CCBE1, HPCAL4, MYL7, CAPN2L, LRP1BB, PCDH2AB2, PCDH2AB1, PCDH11, CAPN3B, NPNTA, PCDH2AB9, PCDH12, PCDH2AB5, PCDH17, ANXA13L, CRACR2B, PLCD3A, ANXA5B, S100A11, CASQ1B, CASQ1A, MICU3B, LOXL2A, PCDH1A, HRC, PLCD4A, FAT2, NOX5, PCDH1B, CALR, EFCC1, ANKEF1B, RET, MYLPFA, FKBP14, CD248A, STAB2, VLDLR, STAB1, ZGC:66455, PLCD1A, DCHS1B…	3500	701	17012	1.49076	2.16421e-07	2.16421e-07	2.14573e-07
GOTERM_MF_DIRECT	GO:0030527~structural constituent of chromatin	32	0.685812	5.85139e-09	H2AX, SI:DKEY-261M9.19, SI:CH211-113A14.18, SI:CH73-368J24.11, ZGC:173552, HIST1H2A5, SI:DKEY-23A13.9, ZGC:113983, ZGC:153405, HIST1H2A6, HIST1H2A1, SI:DKEY-261M9.12, H1-10, ZGC:194989, ZGC:163040, ANO9A, SI:DKEY-108K21.21, ZGC:163061, ZGC:171759, SI:CH73-368J24.12, SI:CH211-113A14.24, ZGC:110425, SI:CH1073-153I20.5, ZGC:154164, ZGC:173585, ZGC:173587, H1-0, SI:DKEY-23A13.22, SI:DKEY-108K21.10, S…	3500	55	17012	2.82797	9.59038e-06	4.79521e-06	4.75425e-06
GOTERM_MF_DIRECT	GO:0005125~cytokine activity	68	1.45735	9.92253e-09	BMP10, CCL19B, WNT6B, CCL38.1, CXCL19, BMP16, GREM1A, CXCL20, WNT2BB, ACTB1, CSF3A, CSF3B, IL12BB, KITLGA, CCL27B, CCL19A.1, CCL34A.4, CCL34A.3, CCL38A.4, IL10, CXCL18B, SI:CH73-226L13.2, CCL44, WNT9B, IL16, CXCL11.6, WNT16, BMP2A, IL1B, IL11B, IL11A, INHBAB, INHBAA, WNT8A, CCL39.2, CCL35.1, CCL35.2, CXCL18A.1, CSF1A, CSF1B, THPO, BMP7B, CCL25A, CCL25B, ALKAL1, NDP, CCL34B.4, CXCL12B, WNT7BB, CXC…	3500	169	17012	1.95573	1.62629e-05	5.42101e-06	5.3747e-06
GOTERM_MF_DIRECT	GO:0008083~growth factor activity	53	1.13588	5.48125e-06	BMP10, MDKA, BMP16, FGF3, NGFB, IGF2A, ACTB1, CSF3A, CSF3B, FGF8A, KITLGA, VEGFBA, NRG1, OGNA, PDGFBB, BMP2A, IL11B, IL11A, INHBAB, VEGFAA, INHBAA, OSGN1, TGFA, FGF18B, FGF6A, GSDF, PDGFAA, CSF1A, CSF1B, BMP7B, NTF3, PDGFAB, PDGFC, CXCL12B, CXCL12A, GDF10A, FGF21, EGF, FGF13A, BMP8A, GDF2, IGF3, VEGFC, INHBB, IGF1, BMP6, BMP5, GDF7, MANF, IL4, IL6, FGF14, LFT1	3500	141	17012	1.82702	0.00894355	0.00224594	0.00222676
GOTERM_MF_DIRECT	GO:0003777~microtubule motor activity	24	0.514359	4.66826e-05	KIF14, KIF1AA, KIF1AB, ZGC:56231, KIF11, KIF22, KIF6, KIF4, KIF15, CENPE, KIF20BB, KIF9, KIF18A, KIF20BA, KIF19, KIFC1, KIF21A, KIF2C, KIFC3, KIF20A, KIF26AA, KIF26BB, KIF26BA, KIF13BB	3500	50	17012	2.33307	0.0736606	0.0153026	0.0151719
GOTERM_MF_DIRECT	GO:0008009~chemokine activity	26	0.557222	5.94377e-05	CCL19B, CCL39.7, CCL38.1, CXCL19, CCL39.2, CCL35.1, CCL35.2, CXCL18A.1, CXCL20, CCL27B, CCL25A, CCL25B, CCL34B.4, CXCL12B, CCL19A.1, CXCL12A, CCL34A.4, CCL34A.3, CCL38A.4, CXCL18B, CCL44, CCL34B.9, CXCL11.6, CCL20A.3, CXCL8A, CCL20B	3500	57	17012	2.2171	0.0928262	0.0162364	0.0160977
GOTERM_MF_DIRECT	GO:0003779~actin binding	95	2.03601	0.000148378	FMNL2B, MYHA, GSNB, SYNE2B, MYHB, LIMCH1A, ABRAA, ZGC:109889, WIPF2B, MYO1HB, WIPF3, MYO1HA, MYHZ1.1, CALD1B, MYHC4, ESPN, FSCN1A, SYNPO2LA, SYNPO2LB, CFL1L, CFL2, CFL1, COTL1, ENC3, PLS3, MSRB1A, PLS1, VASPA, CNN3B, PDLIM3A, MLPHB, SYN1, ENAH, MYO3B, DAAM2, INPPL1B, MAP1B, EPS8L3A, TPMA, MYO3A, TAGLN2, LCP1, UTRN, PFN1, MYH6, GSNA, RAI14, CAPGB, FHL3A, FHL3B, ABLIM1B, ACTN3A, MYO6B, ACTN3B, SMTN…	3500	323	17012	1.42958	0.215893	0.0338166	0.0335278
GOTERM_MF_DIRECT	GO:0008201~heparin binding	33	0.707244	0.00016506	VEGFAA, RTN4R, LRRC15, FGFR1A, ECM2, SERPINC1, SI:DKEY-32E6.6, COL11A1B, MDKA, PTPRFB, NELL2A, NTD5, PCOLCEB, LRTM2A, SI:DKEY-6N6.1, CCN6, CHAD, RSPO2, CCN5, FN1B, RSPO3, RSPO1, CCN1, VASNA, COL5A3A, VEGFBA, APOEB, WU:FC38H03, NRP2A, CCN2B, CCN4A, SMOC1, IMPG1B	3500	84	17012	1.90951	0.237044	0.0338166	0.0335278
GOTERM_MF_DIRECT	GO:0048020~CCR chemokine receptor binding	17	0.364338	0.000199544	CCL44, CCL19B, CCL39.7, CCL34B.9, CCL38.1, CCL20A.3, CCL39.2, CCL35.1, CCL35.2, CCL20B, CCL25A, CCL25B, CCL34B.4, CCL19A.1, CCL34A.4, CCL34A.3, CCL38A.4	3500	32	17012	2.58218	0.278977	0.0363391	0.0360287
GOTERM_MF_DIRECT	GO:0004888~transmembrane signaling receptor activity	61	1.30733	0.000302878	GABRB3, ADGRL2A, LMBR1L, GLRBA, PIGR, PIGRL4.2, GHRHRA, VIPR2, TLR20.2, FZD10, ADGRG4A, SI:DKEY-23A13.11, CELSR2, CD44B, SI:CH211-9D9.7, ADGRG11, ADGRE10, FZD9A, PIGRL2.3, FZD9B, SI:CH211-264F5.2, CHRNB1, ANTXR1B, HTR3A, GABRB2A, ADGRF3A, GABBR1B, TLR1, ADGRE5B.3, SI:CH211-163C2.2, ADGRE5B.2, GABRR2B, CHRNB1L, TLR2, PIGRL3.5, CHRNA5, TLR5B, GIPR, CHRNA4B, PTH3R, SI:DKEY-23A13.2, ADCYAP1R1A, ADGRG…	3500	192	17012	1.54424	0.391338	0.0496418	0.0492177
GOTERM_MF_DIRECT	GO:0008017~microtubule binding	63	1.35019	0.000636841	CGNB, KIF14, KIF11, KIF15, MAP4L, DNM1A, KIF19, DNM1B, NUSAP1, KIF21A, GTSE1, DLGAP5, APC2, HAUS6, KIF22, TERF1, KIF6, MAP1LC3CL, KIF4, EML5, KIF9, KIFC1, MAP1B, KIF2C, KIFC3, KIF20A, SI:CH211-51A19.5, KIF1AA, KIF1AB, ZGC:56231, SKA1, GAS2B, SI:DKEY-103D23.3, KIF20BB, KIF20BA, DNM3A, MAP2, ZGC:86764, FSD1, KIF26BB, GAS2L1, MAP6A, KIF26BA, MAP9, SPAG6, MAPRE1A, CFAP157, CENPE, TPX2, MAPTA, CENPF, …	3500	205	17012	1.49374	0.647997	0.0948893	0.0940788
GOTERM_MF_DIRECT	GO:0008236~serine-type peptidase activity	39	0.835834	0.000969239	CFD, PCSK2, PCSK1, PRSS1, TMPRSS5, ST14A, HPN, PREP, TMPRSS2, PCSK9, PLG, ZGC:112038, SI:DKEY-33M11.8, HTRA1B, SI:DKEY-78L4.7, CELA1.6, ZGC:100868, ELA2, ZGC:165423, HABP2, TMPRSS13A, ZGC:154142, ZGC:136971, DPP6A, F2, SI:DKEYP-93A5.3, DPP6B, CTRL, RBP3, SI:DKEY-78L4.2, SI:DKEY-21E2.10, SI:CH73-127M5.1, ZGC:92590, F7L, ZGC:123295, ELA2L, MASP1, SI:DKEY-21E2.15, SI:CH211-51A6.2	3500	114	17012	1.66283	0.795943	0.118381	0.11737
GOTERM_MF_DIRECT	GO:0003688~DNA replication origin binding	8	0.171453	0.00102888	ORC5, ORC4, POLA1, CDC45, ORC3, MCM10, MCM5, CDC6	3500	10	17012	3.88846	0.814963	0.118381	0.11737
GOTERM_MF_DIRECT	GO:0003774~motor activity	22	0.471496	0.0011665	MYHA, MYHB, MYO1EB, MYO10, MYO1HB, MYO1HA, MYO15AA, MYO6B, MYH11A, MYHZ1.1, MYO9B, MYHC4, SMYHC2, MYO1D, MYO3B, MYO5B, MYH7L, MYO3A, MYH7BB, MYO5C, MYO1F, MYH6	3500	53	17012	2.0176	0.852366	0.118381	0.11737
GOTERM_MF_DIRECT	GO:0051015~actin filament binding	69	1.47878	0.00118699	FMNL2B, MYHA, GSNB, MYHB, ARPC5B, ARPC5A, MYO1HA, MYHZ1.1, MYHC4, ESPN, FSCN1A, LIMD2, CORO2BA, CORO2BB, CFL1L, CFL2, SPTBN4A, CFL1, COTL1, LIMA1A, PLS3, PLS1, CNN3B, MYOM2A, TRIOBPA, TPMA, HCLS1, MARCKSA, TAGLN2, LCP1, MYH6, GSNA, CORO1CB, PPP1R9ALB, CAPGB, ABLIM1B, ACTN3A, MYO6B, ACTN3B, ACTR3B, CORO1A, GAS2B, SCIN, ZGC:101810, HIP1RB, XIRP1, FLNCA, TWF1A, GAS2L1, SCINLA, SCINLB, SI:DKEY-125I10…	3500	234	17012	1.43325	0.857246	0.118381	0.11737
GOTERM_MF_DIRECT	GO:0000146~microfilament motor activity	19	0.407201	0.00122288	MYHA, MYHB, MYO1EB, MYO1HA, MYO15AA, MYO6B, MYH11A, MYHZ1.1, MYO9B, MYHC4, SMYHC2, MYO3B, MYO5B, MYH7L, MYO3A, MYH7BB, MYO5C, MYO1F, MYH6	3500	43	17012	2.14769	0.865411	0.118381	0.11737
GOTERM_MF_DIRECT	GO:0005178~integrin binding	29	0.621517	0.00122787	ITGA6A, VCAM1A, ICAM3, ZGC:174863, SI:CH211-66E2.3, FERMT3A, FERMT3B, GPNMB, TNN, ITGA2.2, CCN6, CCN5, ITGB1B.1, FN1B, ITGB8, ITGB7, ITGB6, CCN1, ITGAE.2, EGFL6, ITGA3B, ITGB3A, ITGA1, CCN2B, CCN4A, ITGA8, ITGA11A, ITGBL1, ITGA9	3500	78	17012	1.80714	0.866509	0.118381	0.11737
GOTERM_MF_DIRECT	GO:0016705~oxidoreductase activity, acting on paired donors, with incorporation or reduction of molecular oxygen	38	0.814402	0.00161445	ZGC:152670, CYP2K8, CYP3C1, CYP2AD2, CYP3C3, PLOD2, P4HA1B, CYP26B1, CYP1A, CYP2K22, PLOD1A, CYP2R1, CYP46A1.1, CYP1B1, CYP1D1, EGLN1A, EGLN1B, CYP2P7, CYP2AA6, EGLN3, EGLN2, CYP2AA2, CYP4F3, CYP3A65, P3H2, CYP27A1.2, CYP2AE1, P3H3, CYP7B1, CYP51, CYP27C1, CYP24A1, CYP26C1, P4HA2, CYP2N13, CYP1C2, CYP1C1, CYP2K19	3500	113	17012	1.63453	0.929223	0.147005	0.145749
GOTERM_MF_DIRECT	GO:0031492~nucleosomal DNA binding	14	0.300043	0.00188361	ZGC:110425, SI:CH211-113A14.18, SI:CH73-368J24.11, SI:DKEY-23A13.9, ZGC:153405, SI:DKEY-261M9.12, H1-0, H1-10, SI:DKEY-108K21.14, SI:DKEY-108K21.10, SI:DKEY-108K21.21, SI:DKEY-23A13.17, SI:CH73-368J24.12, SI:CH211-113A14.24	3500	28	17012	2.43029	0.954505	0.162486	0.161098
GOTERM_MF_DIRECT	GO:0005506~iron ion binding	52	1.11444	0.00221346	ZGC:152670, CYP3C1, CYP2AD2, CYP3C3, PLOD2, CYP26B1, CYP1A, AOX5, PLOD1A, CYP2R1, CYP46A1.1, CYP1B1, EGLN1A, EGLN1B, CYP2AA6, CYP2AA2, P3H2, CYP27A1.2, CYP2AE1, P3H3, CYP7B1, CH25H, CYP26C1, CYP2N13, CYP1C2, CYP1C1, ALOX5A, TPH2, ALOX5B.1, HBAA1, ALOX5B.3, CYP2K8, P4HA1B, HBAE1.3, CYP2K22, CYGB2, CYP1D1, CYP2P7, EGLN3, EGLN2, CYP4F3, CYP3A65, CYP51, CYP27C1, CYP24A1, P4HA2, SCD, PAH, RIOX2, CYP2K…	3500	170	17012	1.48676	0.973534	0.181393	0.179844
GOTERM_MF_DIRECT	GO:0004950~chemokine receptor activity	11	0.235748	0.0032092	CXCR3.1, CCR6A, CCR8.1, CCR12B.2, CCR12B.1, CCR9A, ACKR4A, XCR1B.1, XCR1A.1, CXCR4A, CXCR4B	3500	20	17012	2.67331	0.994848	0.25047	0.248331
GOTERM_MF_DIRECT	GO:0003690~double-stranded DNA binding	25	0.535791	0.00342753	SI:CH211-113A14.18, SI:CH73-368J24.11, SI:DKEY-23A13.9, MCM10, ZGC:153405, SI:DKEY-261M9.12, H1-10, RAD51AP1, PSMC3IP, SI:DKEY-108K21.21, SIX7, SI:CH73-368J24.12, SI:CH211-113A14.24, RBBP8, ZGC:110425, MND1, H1-0, GTF2H4, SI:DKEY-108K21.14, MSH6, SI:DKEY-108K21.10, FOSAB, MSH4, SI:DKEY-23A13.17, SIX6B	3500	68	17012	1.78697	0.996402	0.255351	0.25317
GOTERM_MF_DIRECT	GO:0016493~C-C chemokine receptor activity	15	0.321474	0.00360487	CCR8.1, ACKR4A, GPR75, XCR1A.1, CXCR3.1, CXCR3.2, CCR6A, CCR12B.2, CCR12B.1, CCR9A, RXFP3.3A1, CXCR4A, CXCR4B, CCR10, CMKLR1	3500	33	17012	2.20935	0.997312	0.256886	0.254692
GOTERM_MF_DIRECT	GO:0051213~dioxygenase activity	28	0.600086	0.00406938	ZGC:152670, ALOX5B.1, ALOX5B.3, KDM8, BCO2L, PLOD2, P4HA1B, TDO2A, ALKBH5, PLOD1A, KDM7AB, HIF1AN, KDM4AA, EGLN1A, KDM7AA, EGLN1B, EGLN3, EGLN2, HPDA, HGD, P3H2, P3H3, P4HA2, RIOX2, SI:DKEY-10O6.2, CDO1, ALOX5A, IDO1	3500	80	17012	1.7012	0.998748	0.277905	0.275531
GOTERM_MF_DIRECT	GO:0005244~voltage-gated ion channel activity	41	0.878697	0.00445101	KCNG1, KCNG2, KCNG3, SCN1BA, CACNA1SB, KCNA4, CLIC5A, KCNH6A, KCNMA1A, KCNF1B, KCNH1B, KCNJ1B, CLIC5B, SI:CH211-261A10.5, CACNA1AA, KCNK13A, SCN3B, CLIC2, KCNJ5, KCND2, CACNA2D2A, KCNH7, KCNK12, KCNJ14, CACNA2D3, CACNG8B, KCNC3A, KCNA1B, KCNC1A, KCNJ11L, CACNB1, KCNH2A, KCNJ1A.6, KCNJ19B, KCNJ2A, CACNA1HA, CACNA1DA, CACNA1BB, CACNA1BA, KCNJ1A.1, KCNV2A	3500	131	17012	1.52125	0.999332	0.291808	0.289316
GOTERM_MF_DIRECT	GO:0005102~receptor binding	50	1.07158	0.00492512	NXPH2A, WNT6B, ZGC:172120, NTN1A, ZGC:174863, FSCN1A, PTK2BB, NGFB, WNT2BB, ANGPT2B, SI:CH211-241E1.3, FGB, FGA, MST1, WNT9B, NRG1, WNT16, SI:DKEY-169I5.4, ZAP70, ANGPTL7, LCK, ANGPTL5, HCST, FGL2A, ASIP1, NRG3B, WNT8A, PLG, NTN2, STYK1B, CADM1B, SI:DKEY-192G7.3, SRPX2, SI:CH73-206D17.1, TESPA1, NTF3, FN1B, ZGC:195173, NXPH1, WNT7BB, CADM1A, CD276, WNT10A, SRMS, TNK2B, ZGC:112965, FYNA, PTK2AB, O…	3500	168	17012	1.4466	0.999694	0.304022	0.301426
GOTERM_MF_DIRECT	GO:0031418~L-ascorbic acid binding	11	0.235748	0.0050083	ZGC:152670, EGLN3, EGLN2, P4HA2, PLOD1A, P3H2, PLOD2, P3H3, P4HA1B, EGLN1A, EGLN1B	3500	21	17012	2.54601	0.999733	0.304022	0.301426
GOTERM_MF_DIRECT	GO:0016491~oxidoreductase activity	163	3.49336	0.00534306	ERO1A, ZGC:152670, GLDC, CYP2AD2, CPOX, LOXL4, PLOD2, EPX, COX6A1, ALDH1L2, CMAH, TM7SF2, FADS2, ALKBH5, KCNAB2B, PLOD1A, KCNAB2A, CYP1B1, DUOX, MSRB1A, KDM4AA, EGLN1A, OGDHA, EGLN1B, RDH10A, G6PD, YWHAQB, HGD, AKR1B1.1, DIO1, P3H2, CYP27A1.2, PIPOX, CYBB, CYBA, CYP2AE1, P3H3, ZGC:77439, ZGC:110366, ZGC:56585, PGD, ZGC:56622, CH25H, SELENON, MTHFD2L, GAPDHS, CYP1C2, NNT2, CYP1C1, GSTK4, IDO1, ALO…	3500	657	17012	1.2059	0.999846	0.31276	0.310088
GOTERM_MF_DIRECT	GO:0016773~phosphotransferase activity, alcohol group as acceptor	13	0.278611	0.00623858	ZGC:136858, ADPGK, MAP2K4A, HK2, GCK, LIMK1A, FGGY, HKDC1, SHPK, CDK2, FAM20CA, GALK2, GALK1	3500	28	17012	2.25669	0.999965	0.352588	0.349576
GOTERM_MF_DIRECT	GO:0004252~serine-type endopeptidase activity	55	1.17874	0.00659838	PCSK2, SI:CH1073-280E3.1, PCSK1, PRSS1, PREP, HP, PCSK9, SI:DKEY-33M11.8, SI:DKEY-78L4.7, HTRA1B, ZGC:100868, SI:DKEY-14D8.20, GZM3, ZGC:165423, HABP2, ZGC:154142, MST1, ZGC:136971, F2, SI:CH73-127M5.1, F7I, F7L, ELA2L, MASP1, C3A.1, ACTC1B, CFD, TMPRSS5, C1R, ST14A, HPN, TMPRSS2, PLG, ZGC:112038, CELA1.6, DPP4, ELA2, SEC11A, TMPRSS13A, GZMA, PRSS35, SI:DKEYP-93A5.3, GZMK, SI:DKEY-78L4.6, CFBL, C…	3500	191	17012	1.39964	0.999981	0.360492	0.357412
GOTERM_MF_DIRECT	GO:0019957~C-C chemokine binding	14	0.300043	0.00767737	CCR8.1, ACKR4A, XCR1A.1, CXCR3.1, CXCR3.2, CCR6A, CCR12B.2, CCR12B.1, CCR9A, RXFP3.3A1, CXCR4A, CXCR4B, CCR10, CMKLR1	3500	32	17012	2.1265	0.999997	0.38131	0.378052
GOTERM_MF_DIRECT	GO:0001786~phosphatidylserine binding	14	0.300043	0.00767737	SYT5B, SYTL2B, SYT6A, SYT7B, SYT7A, SYT1A, SYT2A, SYT15, TIMD4, SYT9B, ANXA2B, ANXA2A, SYT11B, HAVCR1	3500	32	17012	2.1265	0.999997	0.38131	0.378052
GOTERM_MF_DIRECT	GO:0045499~chemorepellent activity	14	0.300043	0.00767737	SI:CH211-129C21.1, NRG3B, SEMA3C, SEMA6DL, SEMA6E, SEMA3B, SEMA3H, NRG1, SEMA3E, SEMA3AB, SEMA5BA, SEMA3FA, SEMA4GA, SEMA3GA	3500	32	17012	2.1265	0.999997	0.38131	0.378052
GOTERM_MF_DIRECT	GO:0005267~potassium channel activity	26	0.557222	0.0080263	KCNG1, KCNG2, KCNG3, KCNA4, KCNH6A, KCNMA1A, KCNF1B, KCNK5A, KCNH1B, KCNK3B, KCNK1B, SI:CH211-261A10.5, KCNK13A, KCNH3, KCND2, KCNH7, KCNK12, KCNC3A, KCNA1B, KCNC1A, KCNJ11L, TMEM175, KCNH2A, KCNK4A, KCNK2B, KCNV2A	3500	76	17012	1.66283	0.999998	0.386915	0.38361
GOTERM_MF_DIRECT	GO:0044325~ion channel binding	17	0.364338	0.00881914	PDE4BA, PDE4BB, SCN1BA, KCNE4, SI:CH211-126J24.1, ASB18, ANK3A, ASB10, KCNAB2B, CBARPB, ANK1B, RNF207A, KCNIP1B, RIMS1A, SI:CH211-210B2.2, SCN3B, SI:CH211-210B2.4	3500	43	17012	1.92162	1	0.412988	0.40946
GOTERM_MF_DIRECT	GO:0005249~voltage-gated potassium channel activity	24	0.514359	0.0108753	KCNG1, HCN4, KCNH3, KCNQ1.1, KCNG2, KCNG3, KCND2, KCNH7, KCNE4, KCNA4, KCNC3A, KCNA1B, KCNA7, KCNC1A, KCNH6A, SNAP25B, KCNF1B, KCNH2A, KCNH1B, HCN2B, KCNAB2B, KCNAB2A, KCNQ2A, KCNV2A	3500	70	17012	1.66648	1	0.495127	0.490898
GOTERM_MF_DIRECT	GO:0046961~proton-transporting ATPase activity, rotational mechanism	12	0.25718	0.0134608	ATP6V1C1A, ATP6V0A1B, ATP6V1G1, TCIRG1A, ATP6V1AA, ATP6V1H, TCIRG1B, ATP6V1E1B, ATP6V0CA, ATP6V1C1B, ATP6V1F, ATP6V1BA	3500	27	17012	2.16025	1	0.572819	0.567926
GOTERM_MF_DIRECT	GO:0008198~ferrous iron binding	12	0.25718	0.0134608	EGLN3, EGLN2, FTHL27, ACP5B, ACP5A, FTHL30, HIF1AN, FTH1A, CDO1, BCO1, EGLN1A, EGLN1B	3500	27	17012	2.16025	1	0.572819	0.567926
GOTERM_MF_DIRECT	GO:0030215~semaphorin receptor binding	14	0.300043	0.0136302	SI:CH211-129C21.1, SEMA6A, SEMA3C, SEMA6DL, SEMA6E, SEMA3B, SEMA3H, SEMA4F, SEMA3E, SEMA3AB, SEMA5BA, SEMA3FA, SEMA4GA, SEMA3GA	3500	34	17012	2.00141	1	0.572819	0.567926
GOTERM_MF_DIRECT	GO:0015276~ligand-gated ion channel activity	15	0.321474	0.0152163	GRIK5, GRIK3, GRIK4, HTR3A, SI:CH211-251B21.1, GRIN1A, GRIN2BB, GRIN3BA, GRIK1B, GRID1B, GRIA4B, GRIA3A, GRIA3B, TRPA1B, P2RX4A	3500	38	17012	1.91865	1	0.623489	0.618163
GOTERM_MF_DIRECT	GO:0020037~heme binding	47	1.00729	0.0165189	HBBE2, GUCY1B2, HBAA1, HBAE5, PTGS2B, CYP2K8, CYP3C1, CYP2AD2, CYP3C3, EPX, HBAE1.3, CADM1B, TDO2A, CYP26B1, CYP1A, CYP2K22, CYP2R1, CYGB2, CYP46A1.1, CYP1B1, DUOX, CYP1D1, CYP2P7, CYP2AA7, HMOX1A, CYP2AA6, SDHDA, CYP2AA2, CYP4F3, CYP3A65, CYP27A1.2, NGB, CYBA, CYP2AE1, CYP7B1, CYP51, XGB, CYP27C1, CYP24A1, CYP26C1, HBBE1.1, CYP2N13, CYP1C2, CYP1C1, CYP2K19, PTGS2A, IDO1	3500	166	17012	1.37619	1	0.660352	0.654711
GOTERM_MF_DIRECT	GO:0005031~tumor necrosis factor-activated receptor activity	5	0.107158	0.0187479	TNFRSF18, FAS, SI:CH211-112C15.8, TNFRSF11A, TNFRSF1A	3500	6	17012	4.05048	1	0.731616	0.725367
GOTERM_MF_DIRECT	GO:0003677~DNA binding	351	7.5225	0.0200979	CREB5B, ATF2, ZGC:158412, ZGC:113983, ZGC:153405, UNCX4.1, ZGC:194989, SOX2, SOX3, ZEB2B, ZGC:171759, MSANTD1, SOX17, MYB, FOXO3B, CREMA, CREMB, TP63, PKNOX2, WDHD1, MEF2B, DDX11, RFX7A, SOX12, RUNX3, SOX10, WDR76, ZGC:114046, SMARCAD1A, NR1D2A, NEIL3, ZGC:171506, HOXC11B, DNA2, ZFPM1, PIF1, PARPBP, GATA3, BAZ2BA, NR2F6B, BRIP1, PHC2B, TERT, DMRT3A, ZNF703, FOXG1B, BACH2A, JUNE, CTC1, EGR1, PHC1,…	3500	1548	17012	1.10211	1	0.766058	0.759515
GOTERM_MF_DIRECT	GO:0004745~retinol dehydrogenase activity	6	0.12859	0.0219962	DHRS3B, RDH8B, DHRS9, DHRS3A, RDH5, RDH8A	3500	9	17012	3.24038	1	0.771681	0.76509
GOTERM_MF_DIRECT	GO:0004303~estradiol 17-beta-dehydrogenase activity	7	0.150021	0.0221385	RDH8B, HSD17B1, HSD17B12A, HSD17B2, HSD17B7, RDH8A, SI:DKEY-238O13.4	3500	12	17012	2.83533	1	0.771681	0.76509
GOTERM_MF_DIRECT	GO:0017116~single-stranded DNA-dependent ATP-dependent DNA helicase activity	7	0.150021	0.0221385	MCM8, MCM3, MCM4, MCM5, DNA2, CHTF18, MCM2	3500	12	17012	2.83533	1	0.771681	0.76509
GOTERM_MF_DIRECT	GO:0004601~peroxidase activity	14	0.300043	0.0225996	HBBE2, HBAA1, HBAE5, PTGS2B, GPX7, GPX9, HBAE1.3, EPX, PRDX6, TXNDC17, HBBE1.1, PRDX1, DUOX, PTGS2A	3500	36	17012	1.89022	1	0.771681	0.76509
GOTERM_MF_DIRECT	GO:0004866~endopeptidase inhibitor activity	14	0.300043	0.0225996	SI:CH211-262H13.5, CST14B.1, CST14B.2, SI:DKEY-46G23.2, CST14A.1, SI:CH211-284E20.8, KNG1, C4B, C3A.6, C3A.1, SI:CH211-212C13.10, C3B.1, C3A.2, PCSK1NL	3500	36	17012	1.89022	1	0.771681	0.76509
GOTERM_MF_DIRECT	GO:0016702~oxidoreductase activity, acting on single donors with incorporation of molecular oxygen, incorporation of two atoms of oxygen	10	0.214316	0.0238895	ALOX5B.1, ALOX5B.3, PTGS2B, RPE65B, BCO2L, PTGS2A, CDO1, BCO1, IDO1, ALOX5A	3500	22	17012	2.20935	1	0.799078	0.792253
GOTERM_MF_DIRECT	GO:0005216~ion channel activity	57	1.2216	0.0277759	GABRB3, GLRBA, KCNG1, KCNQ1.1, KCNG2, KCNG3, GRIK5, GRIK3, CACNA1SB, GRIK4, KCNH6A, KCNMA1A, TMEM266, KCNF1B, GRIN3BA, KCNH1B, TRPA1B, CHRNB1, KCND2, KCNH7, HTR3A, GABRB2A, KCNA1B, KCNC1A, KCNH2A, GABRR2B, TRPM4B.2, CACNA1BB, CACNA1BA, GRID1B, CHRNB1L, GRIA3A, GRIA3B, KCNV2A, HCN4, CHRNA5, TRPM4A, CHRNA4B, KCNA4, SI:CH211-251B21.1, GRIN1A, CACNA1IA, GRIN2BB, HCN2B, CHRNE, CACNA1AA, GABRR3A, GRIA4…	3500	214	17012	1.29464	1	0.892908	0.885281
GOTERM_MF_DIRECT	GO:0004464~leukotriene-C4 synthase activity	4	0.0857265	0.0294186	ALOX5AP, MGST2, LTC4S, ALOX5A	3500	4	17012	4.86057	1	0.892908	0.885281
GOTERM_MF_DIRECT	GO:0031545~peptidyl-proline 4-dioxygenase activity	4	0.0857265	0.0294186	EGLN3, EGLN2, EGLN1A, EGLN1B	3500	4	17012	4.86057	1	0.892908	0.885281
GOTERM_MF_DIRECT	GO:0017076~purine nucleotide binding	4	0.0857265	0.0294186	POLA1, PCK1, P2RX4A, PCK2	3500	4	17012	4.86057	1	0.892908	0.885281
GOTERM_MF_DIRECT	GO:0004965~G-protein coupled GABA receptor activity	4	0.0857265	0.0294186	GABBR2, GPR156, GABBR1A, GABBR1B	3500	4	17012	4.86057	1	0.892908	0.885281
GOTERM_MF_DIRECT	GO:0008331~high voltage-gated calcium channel activity	8	0.171453	0.0307098	CACNB1, CACNB4B, CACNB3A, CACNA1DA, CACNA1AA, CACNA1BB, CACNA1SB, CACNA1BA	3500	16	17012	2.43029	1	0.904857	0.897128
GOTERM_MF_DIRECT	GO:0004970~ionotropic glutamate receptor activity	12	0.25718	0.0309164	GRIN2BB, GRIN3BA, GRIK1B, GRIK5, GRIK3, GRIK4, GRID1B, SI:CH211-251B21.1, GRIA4B, GRIA3A, GRIN1A, GRIA3B	3500	30	17012	1.94423	1	0.904857	0.897128
GOTERM_MF_DIRECT	GO:0038191~neuropilin binding	6	0.12859	0.0366476	SEMA3AB, SEMA3C, SEMA3FA, SEMA3B, SEMA3H, SEMA3E	3500	10	17012	2.91634	1	1	0.992063
GOTERM_MF_DIRECT	GO:0015277~kainate selective glutamate receptor activity	5	0.107158	0.0366733	GRIK1B, GRIK5, GRIK3, GRIK4, SI:CH211-251B21.1	3500	7	17012	3.47184	1	1	0.992063
GOTERM_MF_DIRECT	GO:0000978~RNA polymerase II core promoter proximal region sequence-specific DNA binding	245	5.25075	0.0377335	SP8A, CREB5B, ATF2, ZNF296, ZNF973, ZNF977, IKZF2, SI:DKEY-253D23.2, SI:DKEY-57K17.1, SI:DKEY-57C22.1, SOX2, SOX3, ZNF1085, ZEB2B, SOX17, MYB, FOXO3B, CREMA, CREMB, TP63, PKNOX2, MEF2B, SOX13, RFX7A, SOX12, RUNX3, SOX10, NR1D2A, ZGC:171506, HOXC11B, SKOR1A, ZNF995, HER15.2, GATA3, NR2F6B, DMRT3A, SI:DKEYP-77C4.5, PRDM1A, BACH2A, JUNE, EGR1, DRLL.3, JUND, EGR3, SIX4B, SI:DKEY-201G16.1, BACH2B, NR1…	3500	1073	17012	1.10982	1	1	0.992063
GOTERM_MF_DIRECT	GO:0008528~G-protein coupled peptide receptor activity	17	0.364338	0.0387205	GPR37A, GHRHRA, VIPR2, GIPR, GPR84, LTB4R2A, GRPR, RXFP1, PTH3R, LTB4R, TSHR, ADCYAP1R1A, CRHR2, GALR2B, RXFP2A, PTH2RA, KISS1RB	3500	50	17012	1.65259	1	1	0.992063
GOTERM_MF_DIRECT	GO:0005201~extracellular matrix structural constituent	23	0.492928	0.0393372	COL5A3A, COL5A2B, SI:CH211-158D24.2, COL11A1B, LAMB4, COL10A1B, ZGC:153932, COL27A1B, PRELP, SI:CH211-103F14.3, COL28A2A, SI:DKEY-220K22.1, MARCO, COL18A1A, COL4A4, SI:CH211-241E1.3, COL2A1B, FBN2A, SI:DKEY-14D8.6, COL15A1B, COL4A5, ELNB, SI:DKEYP-110A12.4	3500	74	17012	1.51072	1	1	0.992063
GOTERM_MF_DIRECT	GO:0015631~tubulin binding	13	0.278611	0.0415927	STMN3, STMN4, MAP4L, MAPTA, TPPP3, TTLL5, TPPP2, STMN1A, MAP2, TTLL2, TTLL1, CENPJ, STMN4L	3500	35	17012	1.80536	1	1	0.992063
GOTERM_MF_DIRECT	GO:0005245~voltage-gated calcium channel activity	16	0.342906	0.0454467	CACNA2D2A, CACNB4B, CACNB3A, CACNA2D3, CACNG8B, CACNA1SB, CACNG5B, CACNG6B, CACNA1IA, CACNB1, CACNA1HA, CACNA1DA, CACNA1AA, CACNA1BB, CACHD1, CACNA1BA	3500	47	17012	1.65466	1	1	0.992063
GOTERM_MF_DIRECT	GO:0005520~insulin-like growth factor binding	12	0.25718	0.0490617	CCN2B, ESM1, CCN4A, IGFBP3, CCN6, CCN5, SI:CH73-330K17.3, CCN1, IGFBP2A, IGFBP1A, HTRA1B, IGFBP2B	3500	32	17012	1.82271	1	1	0.992063
GOTERM_MF_DIRECT	GO:0046935~1-phosphatidylinositol-3-kinase regulator activity	9	0.192885	0.0498013	SOCS3B, PIK3R6B, SOCS3A, PIK3R3A, CISH, SOCS1B, SOCS1A, PIK3R1, PIK3R5	3500	21	17012	2.0831	1	1	0.992063
GOTERM_MF_DIRECT	GO:0038023~signaling receptor activity	38	0.814402	0.0509381	PAQR7B, SI:RP71-81E14.2, NOTCH3, NLGN1, PAQR5B, TLR5B, GRIK5, GRIK3, GRIK4, TLR20.2, SI:CH211-251B21.1, MRC1B, GRIN1A, MRC1A, AMOT, GRIN3BA, GRIN2BB, GFRA1A, ITGB1B.1, ITGB6, GRIA4B, STRA6, SI:CH73-361P23.3, PAQR9, TNFRSF9B, ANTXR1B, GFRA3, EDAR, TLR1, GRIK1B, GFRA2A, TLR4BB, NLGN3A, GRID1B, GRIA3A, CEL.1, GRIA3B, TLR2	3500	139	17012	1.32879	1	1	0.992063
GOTERM_MF_DIRECT	GO:0005544~calcium-dependent phospholipid binding	19	0.407201	0.0539267	SYT5B, SYT6A, SYT7B, SYT7A, SYT1A, SYT2A, SYT15, PLA2G4F.1, SYT9B, CPNE4A, ANXA13L, CPNE5B, ZGC:101699, ANXA2B, ANXA2A, CPNE2, SYT11B, ANXA5B, PLA2G4AB	3500	60	17012	1.53918	1	1	0.992063
GOTERM_MF_DIRECT	GO:0004725~protein tyrosine phosphatase activity	34	0.728676	0.0567266	PTPRT, PTPRR, ZGC:153981, DUSP3A, PTPRQ, SI:DKEY-175M17.7, PTPRO, PTPRFA, PTPN20, PTPRFB, PTPRH, DUSP14, CA16B, PTPRJB.1, PTPRZ1B, DUSP10, PTPRZ1A, CDC14AB, MTMR1A, PTPRUA, DUSP13A, PTPRSA, MTMR7A, PTPRN2, EYA1, DUSP1, PTPREB, DUSP28, TNS2A, ZGC:77752, DUSP6, PTPRNA, PTPRB, DUSP22B	3500	123	17012	1.34357	1	1	0.992063
GOTERM_MF_DIRECT	GO:0004435~phosphatidylinositol phospholipase C activity	8	0.171453	0.0584509	PLCH2A, PLCH2B, PLCD4A, PLCE1, PLCD3A, PLCD1B, PLCB2, PLCD1A	3500	18	17012	2.16025	1	1	0.992063
GOTERM_MF_DIRECT	GO:0015459~potassium channel regulator activity	8	0.171453	0.0584509	SI:CH211-195B13.1, DPP6B, KCNE4, KCNAB2B, KCNMB2, KCNIP1B, DPP6A, SGK1	3500	18	17012	2.16025	1	1	0.992063
GOTERM_MF_DIRECT	GO:0017147~Wnt-protein binding	12	0.25718	0.0603821	PORCN, NID1A, FZD5, SFRP5, APCDD1L, ROR1, FZD3A, FZD10, FZD9A, FZD9B, FZD8A, PORCNL	3500	33	17012	1.76748	1	1	0.992063
GOTERM_MF_DIRECT	GO:0070700~BMP receptor binding	5	0.107158	0.0615954	BMP2A, BMP7B, BMP8A, BMP6, BMP5	3500	8	17012	3.03786	1	1	0.992063
GOTERM_MF_DIRECT	GO:0047498~calcium-dependent phospholipase A2 activity	5	0.107158	0.0615954	ZGC:101699, PLA2G1B, PLA2G4F.1, OC90, PLA2G4AB	3500	8	17012	3.03786	1	1	0.992063
GOTERM_MF_DIRECT	GO:0005515~protein binding	80	1.71453	0.0621997	APOBEC2B, ROBO2, RET, PIWIL1, NUMA1, MYLPFA, IRF1B, GMNN, LRRC4.1, CACNA1SB, ARRB1, KCTD12.1, HSP90AA1.1, GLI1, LRRC4CA, SOX9A, HEY2, LRRTM2, MYB, CCN6, SI:DKEY-11F4.16, SLC4A1A, FOXO3B, DCHS1B, GPR183A, ISLR2, NRP2A, EOMESA, DICER1, KIF22, ZFPM2B, SYN1, SIGIRR, CACNB1, RIPPLY1, ELFN2A, BCAN, MAG, DKK1B, MMP11B, LNX2B, MYOD1, RTN4RL2A, EIF4EBP3L, CD226, ZFPM1, VEGFAA, RTN4R, PCDH18B, TLR5B, CAPN3…	3500	327	17012	1.18913	1	1	0.992063
GOTERM_MF_DIRECT	GO:0050750~low-density lipoprotein particle receptor binding	4	0.0857265	0.0623462	APOBB.1, APOBB.2, APOEB, APOBA	3500	5	17012	3.88846	1	1	0.992063
GOTERM_MF_DIRECT	GO:0030955~potassium ion binding	4	0.0857265	0.0623462	PKLR, PKMB, KCNA4, PKMA	3500	5	17012	3.88846	1	1	0.992063
GOTERM_MF_DIRECT	GO:0031543~peptidyl-proline dioxygenase activity	4	0.0857265	0.0623462	EGLN3, EGLN2, EGLN1A, EGLN1B	3500	5	17012	3.88846	1	1	0.992063
GOTERM_MF_DIRECT	GO:0098632~protein binding involved in cell-cell adhesion	12	0.25718	0.0732879	LRRC4CA, CNTN1A, ESAMA, CLSTN3, NPTNA, MYOT, VSTM2L, L1CAMB, ZGC:174863, EMB, NFASCA, DSCAML1	3500	34	17012	1.7155	1	1	0.992063
GOTERM_MF_DIRECT	GO:0015179~L-amino acid transmembrane transporter activity	8	0.171453	0.0766724	SI:CH73-352P4.8, SLC7A8A, SLC7A7, SI:DKEYP-120H9.1, SLC7A10A, SLC43A2B, SLC43A1A, SLC38A4	3500	19	17012	2.04656	1	1	0.992063
GOTERM_MF_DIRECT	GO:0005516~calmodulin binding	32	0.685812	0.0800754	SLC8A4A, MKNK2B, KCNQ1.1, RASGRF2B, CAMK2A, CALD1B, LSP1B, MYLKA, PPP3CA, EPB41L4A, EEF2K, KCNH1B, KCNN1A, KCNN1B, CAMK1GB, MAP6A, STRA6, IQCB1, CNN3B, CAMK2D2, AKAP12A, MYO1D, SLC8A3, ASPM, MAPKAPK3, CAMK4, FAS, MARCKSA, KCNQ2A, CAMK1DA, CAMKVL, CAMK1DB	3500	118	17012	1.31812	1	1	0.992063
GOTERM_MF_DIRECT	GO:0004713~protein tyrosine kinase activity	35	0.750107	0.0801169	DDR1, RET, FGFR1A, DYRK3, LTK, PTPN20, TTK, EK1, CITA, PTK2BB, STYK1B, SI:CH73-206D17.1, EPHB3A, PBK, EPHA6, SRMS, TNK2A, TNK2B, TNK1, FYNA, MATK, KITA, PTK2AB, HIPK3A, NTRK2A, NTRK2B, MST1RA, ZAP70, EPHA4B, EPHB4A, LCK, ERBB3A, TEK, FGFR3, MET	3500	131	17012	1.29863	1	1	0.992063
GOTERM_MF_DIRECT	GO:2001069~glycogen binding	6	0.12859	0.08027	PPP1R3DA, PPP1R3B, STBD1, PPP1R3CA, PPP1R3AA, PPP1R3AB	3500	12	17012	2.43029	1	1	0.992063
GOTERM_MF_DIRECT	GO:0005540~hyaluronic acid binding	9	0.192885	0.0818624	ACANB, BCAN, ACANA, VCANB, STAB1, STAB2, HMMR, VCANA, CD44B	3500	23	17012	1.90196	1	1	0.992063
GOTERM_MF_DIRECT	GO:0045296~cadherin binding	15	0.321474	0.0868871	DCHS1B, CDH7A, PKP3A, CTNND2B, CDHR5B, ARVCFA, CDH6, PTPRB, CDH1, CDH26.2, CDH26.1, PKP2, CDH27, CDH17, CDH28	3500	47	17012	1.55125	1	1	0.992063
GOTERM_MF_DIRECT	GO:0003700~transcription factor activity, sequence-specific DNA binding	137	2.93613	0.0878448	HOXB3A, ATF2, CREB5B, ZNF296, IRF1B, RORC, RORB, IKZF2, SI:CH211-153J24.3, ETS1, ETS2, SOX2, SOX3, PBX3B, JDP2B, CREB3L1, MYB, BCL11AB, FOXO3B, CREMA, CREMB, TP63, FOXJ1A, HOXB2A, HOXB4A, TBX3A, RFX7A, RUNX3, SI:DKEYP-2E4.6, NR1D2A, MYCH, IRF10, PGR, VEZF1A, POU2F1B, RXRAB, ZNF995, EPAS1A, GATA3, FOXC1B, NR2F6B, OTX1, FOXG1B, PRDM1A, POU2F2A, JUNE, TFAP2A, BACH2A, FOSL1A, JUND, TFAP2E, BACH2B, ES…	3500	595	17012	1.11916	1	1	0.992063
GOTERM_MF_DIRECT	GO:0005523~tropomyosin binding	7	0.150021	0.0912961	TNNT2D, LMOD1A, LMOD1B, TNNT2B, LMOD2A, TNNT2C, LMOD3	3500	16	17012	2.1265	1	1	0.992063
GOTERM_MF_DIRECT	GO:0005391~sodium:potassium-exchanging ATPase activity	5	0.107158	0.0932748	ATP1A3A, ATP1A1B, ATP1A2A, ATP1A3B, ATP1A1A.2	3500	9	17012	2.70032	1	1	0.992063
GOTERM_MF_DIRECT	GO:0004957~prostaglandin E receptor activity	5	0.107158	0.0932748	PTGER1C, PTGER1A, PTGER3, PTGER2A, PTGER4A	3500	9	17012	2.70032	1	1	0.992063
GOTERM_MF_DIRECT	GO:0008556~potassium-transporting ATPase activity	5	0.107158	0.0932748	ATP1A3A, ATP1A1B, ATP1A2A, ATP1A3B, ATP1A1A.2	3500	9	17012	2.70032	1	1	0.992063
GOTERM_MF_DIRECT	GO:0051864~histone demethylase activity (H3-K36 specific)	5	0.107158	0.0932748	RIOX2, KDM8, KDM7AB, KDM4AA, KDM7AA	3500	9	17012	2.70032	1	1	0.992063
