# Supplementary material for: Forward genetic screen using a gene-breaking trap approach identifies a novel role of grin2bb-associated RNA transcript (grin2bbART) in zebrafish heart function
Source: Front Cell Dev Biol. 2024 Mar 8;12:1339292. doi: 10.3389/fcell.2024.1339292 (PMC10964321; doi:10.3389/fcell.2024.1339292)
Supplement: Supplementary file 11 [file Table4.XLSX]

## Sheet: Sheet1
Category	Term	Count	%	P Value	Genes	List Total	Pop Hits	Pop Total	Fold Enrichment	Bonferroni	Benjamini	FDR
KEGG_PATHWAY	dre03030:DNA replication	22	0.471496	2.82377e-06	RFC5, PRIM2, FEN1, RFC4, RNASEH2A, PCNA, RFC1, PRIM1, RPA2, POLA1, POLA2, POLD1, POLE2, RPA3, POLD2, MCM3, MCM4, MCM5, MCM6, DNA2, POLE, MCM2	1545	38	7456	2.79394	0.000488394	0.000488513	0.000468746
KEGG_PATHWAY	dre04514:Cell adhesion molecules	67	1.43592	5.83951e-06	CNTNAP1, ITGA6A, VCAM1B, ZGC:172120, PTPRFA, LRRC4.2, LRRC4.1, PTPRFB, CLDN2, VSIR, LRRC4CA, CDH1, MPZ, ITGB8, ITGB7, SI:CH73-61D6.3, PTPRSA, MHC2DAB, CLDNF, CLDNE, CLDNI, NRXN1A, CNTNAP2B, NTNG1A, MAG, LRRC4BA, CNTNAP2A, ITGA8, NLGN3A, CD226, VCANA, CLDN5A, CLDNA, SI:DKEY-11F4.20, ITGA9, NLGN1, NEO1A, VTCN1, NRXN2A, NTNG2A, CADM1B, F11R.1, CNTN1A, OCLNA, SI:BUSM1-194E12.8, SLITRK2, ESAMA, L1CAMA…	1545	192	7456	1.68403	0.00100973	0.000505118	0.000484679
KEGG_PATHWAY	dre04060:Cytokine-cytokine receptor interaction	68	1.45735	0.000527626	BMP10, CSF3R, CCL19B, LEPB, LIFRB, LEPA, CXCL19, BMP16, NGFB, CCL27B, IL13RA2, IL13RA1, IL10, TNFRSF9B, IFNGR1, TNFRSF18, XCR1A.1, CRFB16, IL16, IL17RC, TNFRSF1A, EDAR, BMP2A, M17, PRLRA, IL1B, ACVR1BB, IL11A, INHBAB, INHBAA, TNFRSF11A, NRADD, BMPR1BA, CXCR3.1, CSF1A, CXCR3.2, ACVR1C, THPO, CCR9A, BMP7B, CCL25A, CCL25B, CXCL12B, CXCL12A, GDF10A, TNFSF12, TNFSF13, BMP8A, ACKR4A, XCR1B.1, GDF2, INH…	1545	223	7456	1.47157	0.0872592	0.0261537	0.0250954
KEGG_PATHWAY	dre04020:Calcium signaling pathway	108	2.31462	0.00060471	TACR3A, ADCY1A, CACNA1SB, HTR4, GRPR, FGF3, MYLKA, NGFB, MYLKB, ITPKCB, PLCE1, PRKCG, ADCY2A, F2R, PDGFBB, ATP2B1B, CACNA1BB, CACNA1BA, SLC8A4A, FGFR1A, PPIFA, TGFA, ADRB1, FGF18B, LTB4R2A, GRIN1A, PDGFAA, GRIN2BB, TBXA2R, PDGFAB, PDGFC, PLCD3A, CAMK1GB, P2RX4B, IGHV4-5, FGF21, P2RX4A, CASQ1B, CASQ1A, CACNA1DA, HRC, PLCD4A, AVPR1AA, CHRM5B, FGFR3, CXCR4A, CXCR4B, ADRA1BB, RET, HTR2B, ADRA1D, ATP2…	1545	389	7456	1.33984	0.0993571	0.0261537	0.0250954
KEGG_PATHWAY	dre04814:Motor proteins	74	1.58594	0.00108885	MYHA, MYHB, MYLPFA, MYO1HB, KIF14, MYO1HA, MYHZ1.1, BICDL2, MYHC4, KIF11, KIF15, TUBA1C, ACTB1, KIF19, TUBA1A, KIF21A, KIF22, DYNLL1, KIF6, DYNC1I2A, KIF4, TUBB2B, KIF9, MYL7, MYO3B, KIFC1, TPMA, MYO3A, KIF2C, KIFC3, KIF20A, MYH6, ACTC1B, ACTC1A, TNNI4A, DNAH5, DNAH6, MYO6B, KIF1AA, KIF1AB, ZGC:56231, KIF20BB, KIF20BA, TNNT2D, TNNT2B, TNNT2C, KIF26BB, DNAH5L, KIF26BA, MYO1EB, MYO10, TNNC1B, MYO15…	1545	253	7456	1.41153	0.171777	0.0376741	0.0361497
KEGG_PATHWAY	dre04145:Phagosome	54	1.15731	0.00312691	NCF1, NCF2, ATP6V1AA, MRC1B, MRC1A, ATP6V0CA, COMP, TFR1B, TUBA1C, ACTB1, TUBA1A, CTSS2.1, ITGA2.2, CTSS1, MHC2DAB, CTSLA, ATP6V1G1, CYBB, CYBA, ATP6AP1B, TAP2A, ATP6V1E1B, DYNC1I2A, ATP6V1C1B, ATP6V1BA, C3A.6, TUBB2B, ATP6V0A1B, CANX, C3A.1, C3A.2, TLR2, COLEC12, SI:CH211-274F20.2, CORO1A, ATP6V1C1A, SI:BUSM1-194E12.8, TCIRG1A, CTSL.1, ATP6V1H, IGHV4-5, CALR3A, CALR3B, ATP6V1F, LAMP1A, ITGB3A, M…	1545	180	7456	1.44777	0.418301	0.0901591	0.086511
KEGG_PATHWAY	dre04110:Cell cycle	56	1.20017	0.00445695	GADD45BB, CDC14AB, CHEK2, CHEK1, CDK21, YWHAQB, RAD21L1, DDX11, PPP2R5A, KNL1, ESCO2, YWHAZ, SGO1, CCNA1, CCNE2, ESPL1, CCNE1, MCM3, MCM4, MCM5, ANAPC5, MCM6, PPP2R1BB, CDKN1BB, MCM2, PCNA, CDCA5, TTK, DBF4B, AURKB, CCNB3, ORC5, ORC4, CCNB2, CCNB1, CDC45, ORC6, ORC3, E2F1, BUB3, CDKN1CA, CDKN1CB, E2F5, BUB1, CDKN2D, PLK1, MAD2L1BP, CDC6, NDC80, CDK6, GADD45AB, CDK2, CDK1, TRIP13, CREBBPA, MAD2L1	1545	191	7456	1.41492	0.53827	0.106413	0.102107
KEGG_PATHWAY	dre00590:Arachidonic acid metabolism	23	0.492928	0.00492082	ALOX5B.1, SI:DKEY-177P2.18, PTGDSB.2, PTGS2B, HPGD, PTGDSB.1, PLA2G1B, EPHX2, PROCA1, PLA2G4F.1, LTC4S, ZGC:56585, GGT1A, RARRES3L, SI:CH73-55I23.1, PTGES3B, ZGC:153704, ZGC:101699, LTA4H, PTGS2A, PLA2G4AB, ALOX5A, CYP2P7	1545	62	7456	1.79025	0.574037	0.106413	0.102107
KEGG_PATHWAY	dre04672:Intestinal immune network for IgA production	17	0.364338	0.00931891	IL10, PIGR, TNFSF13, IL4, IL6, SI:BUSM1-194E12.8, CCR9A, CCL27B, CCL25A, ITGB7, CCL25B, CXCL12B, IGHV4-5, CXCR4A, CXCL12A, CXCR4B, MHC2DAB	1545	43	7456	1.90791	0.802048	0.177102	0.169936
KEGG_PATHWAY	dre04261:Adrenergic signaling in cardiomyocytes	68	1.45735	0.0102371	ADCY1A, ATF2, CREB5B, KCNQ1.1, SCN1BA, CACNA1SB, ADRA1D, ATP2A1, ATP2A1L, RPS6KA5, ATP1A1B, CREB3L1, CREMA, CREMB, ATP1A1A.2, ADCY2A, CACNA2D2A, CACNA2D1, CAMK2D2, CACNA2D3, PPP2R5A, CACNG8B, ADCY6B, AGTR1A, CACNB1, ATP2B1B, CACNA1FA, ATP1A2A, TPMA, PPP2R1BB, AGTR2, PLCB2, MYH6, ACTC1B, SLC8A4A, PIK3R6B, ACTC1A, CACNB3A, CAMK2A, ADRB1, CACNG5B, ADCY8, ZGC:171775, PIK3R5, ATP1A3A, CREB3L3B, TNNT2D…	1545	249	7456	1.31791	0.831386	0.177102	0.169936
KEGG_PATHWAY	dre00240:Pyrimidine metabolism	23	0.492928	0.0161431	ZGC:136858, RRM1, ENTPD1, DTYMK, RRM2, NT5C2L1, ENTPD5A, ENTPD6, DPYDB, NME4, TYMS, UPB1, DCK, ZGC:110540, DCTD, NME2B.2, CMPK2, NT5C1AB, TK1, UPP1, ZGC:103586, DCTPP1, CDAA	1545	68	7456	1.63229	0.940128	0.253888	0.243615
KEGG_PATHWAY	dre00260:Glycine, serine and threonine metabolism	17	0.364338	0.0230359	GAMT, ALAS1, AOC2, SHMT2, GLDC, SHMT1, PGAM2, PIPOX, GCAT, GRHPRB, BHMT, PSAT1, CHDH, TDH, PGAM1A, GCSHB, PHGDH	1545	47	7456	1.74553	0.982258	0.308202	0.295732
KEGG_PATHWAY	dre04810:Regulation of actin cytoskeleton	82	1.75739	0.0242428	GSNB, ITGA6A, ARPC5B, ARPC5A, MYLPFA, C8B, FGF3, MYLKA, MYLKB, LIMK1A, ACTB1, GNG12A, ITGA2.2, FGF8A, CFL1L, MYLK4A, CFL2, CFL1, RAC2, BDKRB2, BDKRB1, ITGB8, HRASB, ITGB7, ITGB6, CHRM4B, APC2, ITGA3B, F2R, ITGA1, F2, PDGFBB, ENAH, PIP5K1BB, MYL7, ITGA11A, ITGA8, SOS1, PFN1, GSNA, CHRM3A, ITGA9, FGFR1A, BAIAP2A, SI:DKEY-27I16.2, FGF18B, FGF6A, PIK3R1, IQGAP3, ACTR3B, PIP4K2AB, KNG1, INS, PDGFAA, C…	1545	320	7456	1.23663	0.985674	0.308202	0.295732
KEGG_PATHWAY	dre00591:Linoleic acid metabolism	12	0.25718	0.0249412	RARRES3L, SI:DKEY-177P2.18, SI:CH73-55I23.1, ZGC:101699, PLA2G1B, CYP3C1, CYP3A65, CYP3C3, PROCA1, PLA2G4F.1, CYP2P7, PLA2G4AB	1545	29	7456	1.99692	0.987343	0.308202	0.295732
KEGG_PATHWAY	dre01232:Nucleotide metabolism	32	0.685812	0.0329189	DTYMK, AMPD3A, ENTPD5A, AK1, AK5, TYMS, NME2B.2, NT5C1AB, UPP1, TK1, CDAA, ENTPD2A.2, RRM1, ENTPD1, ADSL, AMPD2A, ENTPD2B, RRM2, NT5C2L1, ENTPD6, NME4, DCK, ZGC:110540, DCTD, LACC1, IMPDH1B, PNP5A, PNP5B, CMPK2, AMPD2B, DCTPP1, ZGC:103586	1545	109	7456	1.41678	0.996945	0.361436	0.346811
KEGG_PATHWAY	dre04512:ECM-receptor interaction	31	0.664381	0.0334276	ITGA6A, LAMC3, NPNTA, LAMC2, HMMR, LAMB2L, CD44B, COMP, FREM2B, TNN, SV2A, ITGA2.2, SV2BB, SI:CH211-241E1.3, CHAD, ITGB8, ITGB7, ITGB6, ITGA3B, ITGB3A, LAMB4, ITGA1, FREM1B, FREM1A, COL6A2, COL4A4, COL2A1B, ITGA8, ITGA11A, COL4A5, ITGA9	1545	105	7456	1.42479	0.99721	0.361436	0.346811
KEGG_PATHWAY	dre00520:Amino sugar and nucleotide sugar metabolism	21	0.450064	0.0359848	UGP2A, GPIB, GFPT2, PMM2, HEXA, UAP1, CHIA.1, RENBP, HK2, CMAH, GCK, CYB5R2, GALE, NAGK, GNPDA1, HKDC1, PGM3, PGM2, CHS1, GALK2, GALK1	1545	65	7456	1.55913	0.998236	0.364533	0.349783
KEGG_PATHWAY	dre00670:One carbon pool by folate	9	0.192885	0.0386661	DHFR, MTHFD1A, MTHFD1L, SHMT2, SHMT1, MTHFD2L, TYMS, ALDH1L2, FTCD	1545	20	7456	2.17165	0.99891	0.364533	0.349783
KEGG_PATHWAY	dre04115:p53 signaling pathway	27	0.578654	0.0400354	RPRMB, SERPINE1, CCNB2, CCNB1, GADD45BB, ZMAT3, CHEK2, CHEK1, CDK21, GTSE1, ZNF385A, RRM2, IGFBP3, ADGRB1A, IGF1, RPRM3, CDK6, GADD45AB, CASP22, CCNE2, CCNE1, BAXA, CCNG2, CDK2, CDK1, FAS, TP73	1545	90	7456	1.44777	0.999149	0.364533	0.349783
KEGG_PATHWAY	dre03440:Homologous recombination	14	0.300043	0.0547756	BARD1, XRCC2, RPA2, MRE11A, PALB2, RAD54B, RAD52, RAD51D, BRIP1, POLD1, RPA3, POLD2, RBBP8, RAD54L	1545	40	7456	1.68906	0.999941	0.418738	0.401795
KEGG_PATHWAY	dre04010:MAPK signaling pathway	101	2.16459	0.0556937	ATF2, CACNA1SB, SI:CH211-153J24.3, FGF3, NGFB, IGF2A, RPS6KA5, STMN1A, RPS6KA1, MAP3K8, HRASB, MAP3K9, PRKCG, CACNA2D2A, CACNA2D1, CACNA2D3, MAPK8IP2, PDGFBB, CACNB1, MAPKAPK3, CACNA1BB, PPM1NA, CACNA1BA, FGFR1A, DUSP3A, CACNB3A, MAP2K4A, TGFA, CACNG5B, FGF18B, NRADD, ZGC:171775, RASGRP4, PDGFAA, CSF1A, PDGFAB, PDGFC, FLNCA, FGF21, HSPA8, JUND, CACNB4B, KITA, BRAF, IGF1, CACNG6B, NFKB1, CACNA1DA,…	1545	418	7456	1.16606	0.999951	0.418738	0.401795
KEGG_PATHWAY	dre00830:Retinol metabolism	27	0.578654	0.0576395	ZGC:153441, RDH8B, CYP3C1, ZGC:112332, CYP3C3, DHRS3B, CYP26B1, AOX5, DHRS3A, UGT2A4, UGT5C2, BCO1, UGT2A6, RDH10A, UGT5E1, CYP3A65, SI:DKEY-73N8.3, CYP27C1, CYP26C1, ALDH1A2, DGAT1B, RDH12L, PNPLA4, RDH5, RDH8A, ADH8B, UGT1B7	1545	93	7456	1.40106	0.999965	0.418738	0.401795
KEGG_PATHWAY	dre00010:Glycolysis / Gluconeogenesis	24	0.514359	0.061001	GPIB, PFKLB, PKLR, ADPGK, ENO1B, PGAM2, PKMA, ENO3, HK2, GCK, ALDOCB, LDHA, PKMB, HKDC1, TPI1A, GAPDHS, PGAM1A, PGM2, PCK1, FBP1B, ADH8B, FBP2, LDHBB, PCK2	1545	81	7456	1.42989	0.999981	0.418738	0.401795
KEGG_PATHWAY	dre01250:Biosynthesis of nucleotide sugars	15	0.321474	0.0661829	UGP2A, GPIB, GFPT2, PMM2, UAP1, HK2, CMAH, GCK, GALE, NAGK, HKDC1, PGM3, PGM2, GALK2, GALK1	1545	45	7456	1.60863	0.999993	0.418738	0.401795
KEGG_PATHWAY	dre03430:Mismatch repair	9	0.192885	0.0666949	MSH6, RFC5, RFC4, PCNA, RFC1, POLD1, RPA3, POLD2, RPA2	1545	22	7456	1.97423	0.999993	0.418738	0.401795
KEGG_PATHWAY	dre00100:Steroid biosynthesis	9	0.192885	0.0666949	CYP24A1, SOAT1, CYP2R1, DHCR24, HSD17B7, CEL.1, TM7SF2, CYP51, FDFT1	1545	22	7456	1.97423	0.999993	0.418738	0.401795
KEGG_PATHWAY	dre00592:alpha-Linolenic acid metabolism	9	0.192885	0.0666949	RARRES3L, FADS2, SI:DKEY-177P2.18, SI:CH73-55I23.1, ZGC:101699, PLA2G1B, PROCA1, PLA2G4F.1, PLA2G4AB	1545	22	7456	1.97423	0.999993	0.418738	0.401795
KEGG_PATHWAY	dre04148:Efferocytosis	56	1.20017	0.0677726	SI:CH211-195B13.1, GPR132A, ATP8A2, GPR132B, PTGS2B, STAB2, ATP2A1, ATP2A1L, HIF1AA, HIF1AL, STAB1, HAVCR1, SCARF1, LRP1AA, IL10, CAMK2D2, ANO7, XKR8.2, PTGER2A, XKR8.1, ANO3, PLA2G15, CH25H, CASP21, PPARG, SGK1, GAS6, ALOX5A, ALOX5B.1, CEBPB, CAMK2A, ODC1, CPT1AB, ZGC:171775, PANX1B, PBX1B, SLC2A1A, SLC16A1B, SLC16A1A, GULP1B, CALR3A, CALR3B, P2RY12, MFGE8A, SI:DKEY-165A24.9, ITGB3A, MAPK12B, AD…	1545	220	7456	1.22841	0.999995	0.418738	0.401795
KEGG_PATHWAY	dre00030:Pentose phosphate pathway	12	0.25718	0.0760622	G6PD, TKTB, TKTA, PFKLB, GPIB, SHPK, PGM2, TALDO1, FBP1B, PGD, FBP2, ALDOCB	1545	34	7456	1.70326	0.999999	0.45375	0.43539
