# Supplementary material for: Forward genetic screen using a gene-breaking trap approach identifies a novel role of grin2bb-associated RNA transcript (grin2bbART) in zebrafish heart function
Source: Front Cell Dev Biol. 2024 Mar 8;12:1339292. doi: 10.3389/fcell.2024.1339292 (PMC10964321; doi:10.3389/fcell.2024.1339292)
Supplement: Supplementary file 15 [file Table5.XLSX]

## Sheet: Sheet1
Category	Term	Count	%	P Value	Genes	List Total	Pop Hits	Pop Total	Fold Enrichment	Bonferroni	Benjamini	FDR
GOTERM_BP_DIRECT	GO:0007155~cell adhesion	148	3.17188	3.47572e-11	RIPOR2, SPON1A, CLSTN3, VCAM1A, ICAM3, ZGC:174863, PTPRFB, CTNND2B, CLDN2, CELSR2, CD44B, COMP, CDH6, FERMT3A, FERMT3B, ITGA2.2, CDH1, SI:CH211-241E1.3, CCN6, FBN2A, CCN5, NECTIN4A, CCN1, CLDNF, CLDNE, CLDNI, ITGA3B, ALCAMB, CDHR5B, CTHRC1A, BCAN, MAG, VCANB, CCN4A, INPPL1B, PKP2, NLGN3A, SI:CH73-380L3.2, VCANA, CLDN5A, CLDNA, FREM3, PCDH2AB2, PCDH2AB1, PCDH11, NTM, NPNTA, PCDH2AB9, PCDH12, PCDH2…	3700	436	18136	1.66385	1.16402e-07	1.16402e-07	1.15568e-07
GOTERM_BP_DIRECT	GO:0030261~chromosome condensation	24	0.514359	5.00933e-10	TOP2A, ZGC:110425, SI:CH211-113A14.18, NCAPH2, SI:CH73-368J24.11, NCAPG2, NCAPG, SI:DKEY-23A13.9, ZGC:153405, SI:DKEY-261M9.12, H1-0, NCAPH, H1-10, SI:DKEY-211G8.4, SI:DKEY-108K21.14, SMC2, SI:DKEY-108K21.10, SI:DKEY-108K21.21, SI:DKEY-23A13.17, SI:CH73-368J24.12, SI:CH211-113A14.24, BANF1, NCAPD2, NCAPD3	3700	32	18136	3.67622	1.67762e-06	8.38812e-07	8.32801e-07
GOTERM_BP_DIRECT	GO:0006260~DNA replication	45	0.964423	2.20444e-09	PIF1, PRIM2, FEN1, PCNA, MCM8, DSCC1, PRIM1, MCM10, ORC5, ORC4, CHAF1A, CDC45, ORC6, SSRP1A, POLD1, ORC3, POLD2, MCMBP, POLE, GINS1, RFC5, GINS2, RRM1, RRM2, RFC4, POLN, RFC1, RMI1, DDX11, GINS3, GINS4, RPA2, CDC6, LRWD1, POLA1, POLA2, POLE2, RPA3, MCM3, MCM4, MCM5, MCM6, DNA2, DTL, MCM2	3700	91	18136	2.42388	7.38265e-06	2.46089e-06	2.44326e-06
GOTERM_BP_DIRECT	GO:0007156~homophilic cell adhesion via plasma membrane adhesion molecules	66	1.41449	6.91107e-07	PCDH1G3, ROBO2, RET, PCDH1G29, TENM4, CLSTN3, PCDH1G26, PCDH1G9, OBSL1B, CELSR2, CDH6, MYLKB, PCDH1GB9, CDH1, PCDH1G22, EMB, DCHS1B, PCDH15B, SI:CH211-149E23.4, VSTM2L, PCDH1GB2, CDHR5B, CDHR1A, PCDH7B, PCDH7A, MYOT, DSCAML1, CDH17, PCDH2AB2, PCDH2AB1, SI:DKEY-22O22.2, PCDH18B, PCDH11, PCDH18A, PCDH1A6, PCDH2AB9, PCDH1A3, PCDH12, PCDH10A, PCDH2AB5, PCDH17, CADM1B, IGSF21A, FREM2B, ESAMA, L1CAMA, …	3700	180	18136	1.79726	0.00231184	0.000492764	0.000489233
GOTERM_BP_DIRECT	GO:0070098~chemokine-mediated signaling pathway	28	0.600086	7.35688e-07	CCL19B, CCL39.7, CCL38.1, CXCL19, CCL39.2, CCL35.1, CCL35.2, CXCL20, CXCR3.2, CCR9A, CCL25A, CCL25B, CCL34B.4, CXCL12B, CCL19A.1, CXCL12A, CCL34A.4, CCL34A.3, CCL38A.4, CXCL18B, CCL44, CCL34B.9, CXCL11.6, CCL20A.3, CXCL8A, CCL20B, CXCR4A, CXCR4B	3700	53	18136	2.58954	0.00246079	0.000492764	0.000489233
GOTERM_BP_DIRECT	GO:0006955~immune response	95	2.03601	1.04573e-06	CCL19B, ZGC:172120, CCL38.1, CXCL19, TLR20.2, C8B, MHC2BL, SI:CH73-343L4.8, CXCL20, ZGC:174904, CSF3A, CSF3B, CTSS2.1, CTSK, PRF1.2, CTSS1, RXFP3.3A1, CCL27B, CCL19A.1, CCL34A.4, CCL34A.3, CMKLR1, MHC2DAB, CCL38A.4, PRF1.9, CTSLA, IL10, CXCL18B, SI:CH73-226L13.2, CCL44, XCR1A.1, LGALS17, SI:DKEY-61F9.1, CXCL11.6, TLR1, SI:DKEY-169I5.4, TNFSF10L4, SI:CH211-232P21.6, IGL4V8, IL1B, HHLA2A.1, IL11A, …	3700	291	18136	1.60019	0.00349604	0.000583693	0.00057951
GOTERM_BP_DIRECT	GO:0048731~system development	81	1.73596	1.38034e-06	ADGRL2A, MYHA, MYHB, GHRHRA, VIPR2, FOXP1B, MYO1HB, KIF14, MYO1HA, MYHZ1.1, FZD10, VLDLR, MYHC4, ADGRG4A, KIF11, FOXM1, KIF15, JAG1B, JAG1A, KIF19, ADGRG11, FOXO3B, KIF21A, ADGRE10, FZD9A, FZD9B, FOXI3A, ZGC:66455, FOXL3, ADGRF3A, KIF4, KIF9, ADGRE5B.3, NID1A, MYO3B, ADGRE5B.2, KIFC1, MYO3A, FOXO6B, F7L, KIF2C, KIFC3, FBLN7, SI:DKEY-22O22.2, GIPR, FOXQ1A, MYO6B, KIF1AA, KIF1AB, ZGC:56231, PTH3R, …	3700	239	18136	1.66122	0.0046121	0.000660396	0.000655663
GOTERM_BP_DIRECT	GO:0007160~cell-matrix adhesion	35	0.750107	4.12849e-06	ITGA6A, SI:CH211-39F2.3, SI:CH211-182P11.1, FERMT3A, FERMT3B, TNN, ITGA2.2, NID2A, SI:CH73-329N5.6, ITGB1B.1, FN1B, ITGB7, ITGB6, ARHGEF28A, FGB, SI:DKEY-9L20.3, ITGAE.2, SI:CH73-181M17.1, SI:DKEY-239B22.1, ZGC:112964, STRC1, ITGA3B, ITGB3A, ITGA1, EPDR1, EPDL2, EPDL1, FREM1A, NID1A, ITGA8, ITGA11A, EPD, ITGBL1, HPSE, ITGA9	3700	79	18136	2.1716	0.0137312	0.00172829	0.0017159
GOTERM_BP_DIRECT	GO:0000070~mitotic sister chromatid segregation	14	0.300043	1.87233e-05	NCAPG2, NCAPG, CDCA8, KNSTRN, NCAPH, NSL1, SGO1, DSN1, KIF18A, CENPI, CENPK, KNTC1, NCAPD2, SI:DKEY-225F5.4	3700	20	18136	3.43114	0.0607795	0.00696716	0.00691723
GOTERM_BP_DIRECT	GO:0006954~inflammatory response	56	1.20017	3.70682e-05	PTGS2B, CCL19B, CCL38.1, CXCL19, TLR20.2, SI:CH211-66K16.27, CD44B, CXCL20, SI:CH211-112C15.8, CCL19A.1, CCL34A.4, CCL34A.3, ADAM8A, CCL38A.4, TLR8A, CXCL18B, SI:CH73-226L13.2, PTGIR, CCL44, MST1, CXCL11.6, PTGER2A, AGTR1A, TNFRSF1A, TLR1, PTGER1C, PTGER1A, IL1B, AGTR2, SGK1, TLR2, SI:DKEY-117A8.1, TLR5B, UHRF1, CCL39.7, PTGER3, CCL39.2, CCL35.1, CCL35.2, CXCR3.1, CAIAP, CCL25A, ZGC:195173, CCL25…	3700	162	18136	1.69439	0.116747	0.0104379	0.0103631
GOTERM_BP_DIRECT	GO:0006270~DNA replication initiation	14	0.300043	3.99473e-05	PRIM2, MCM10, CDC6, ORC5, ORC4, POLA2, CDC45, ORC6, ORC3, MCM3, MCM4, MCM5, MCM6, MCM2	3700	21	18136	3.26775	0.125223	0.0104379	0.0103631
GOTERM_BP_DIRECT	GO:0007411~axon guidance	63	1.35019	4.02572e-05	ROBO2, SI:CH211-129C21.1, TENM4, ROBO1, SI:CH211-241E1.3, EFNB2A, SEMA3GA, EMB, PLXNC1, UNC5DB, VASPA, EPHA6, SI:CH211-158D24.2, DCC, SEMA6E, SEMA6DL, NIPA1, VSTM2L, NRP2A, ENAH, SEMA5BA, CDK5R1A, EPHA4B, MYOT, SEMA3FA, CCDC80L1, CDK5R1B, DSCAML1, MET, RTN4R, LRRC15, NEO1A, SEMA3C, NTM, SEMA3B, SEMA3E, EK1, PCDH17, SEMA3AB, CDK5R2B, CNTN1A, EPHB3A, LRTM2A, CHAD, SEMA4GA, NCAM3, L1CAMB, NFASCA, CX…	3700	189	18136	1.63387	0.12613	0.0104379	0.0103631
GOTERM_BP_DIRECT	GO:0006334~nucleosome assembly	24	0.514359	4.06874e-05	ZGC:110425, SI:DKEY-261M9.19, SI:CH211-113A14.18, HIST1H4L, SI:CH73-368J24.11, ZGC:173585, SI:DKEY-23A13.9, NAP1L1, ZGC:153405, SI:DKEY-261M9.12, SI:DKEY-23A13.22, H1-0, H1-10, ZGC:114046, ZGC:163040, SI:DKEY-108K21.10, CHAF1B, SI:DKEY-108K21.21, ZGC:163061, CHAF1A, SI:DKEY-23A13.17, SI:CH73-368J24.12, SI:CH211-113A14.24, SI:CH211-113A14.22	3700	50	18136	2.35278	0.127389	0.0104379	0.0103631
GOTERM_BP_DIRECT	GO:0030593~neutrophil chemotaxis	31	0.664381	4.3634e-05	CCL19B, CCL39.7, CCL38.1, CXCL19, CCL39.2, CCL35.1, CCL35.2, CXCL20, AANAT2, CSF3B, RAC2, CCL25A, DUOX, CCL25B, LTA4H, CCL34B.4, CCL19A.1, S1PR4, CCL34A.4, CCL34A.3, CCL38A.4, CXCL18B, CCL44, CCL34B.9, CXCL11.6, CCL20A.3, CXCL8A, TNFRSF1A, CCL20B, SAA, IL1B	3700	73	18136	2.08151	0.135958	0.0104379	0.0103631
GOTERM_BP_DIRECT	GO:0045910~negative regulation of DNA recombination	15	0.321474	5.11091e-05	ZGC:110425, SI:CH211-113A14.18, SI:CH73-368J24.11, SI:DKEY-23A13.9, ZGC:153405, SI:DKEY-261M9.12, H1-0, H1-10, SI:DKEY-108K21.14, MSH6, SI:DKEY-108K21.10, SI:DKEY-108K21.21, SI:DKEY-23A13.17, SI:CH73-368J24.12, SI:CH211-113A14.24	3700	24	18136	3.06351	0.157321	0.011411	0.0113292
GOTERM_BP_DIRECT	GO:0030198~extracellular matrix organization	45	0.964423	6.64119e-05	VIT, ECM2, COL16A1, COL5A2B, SI:DKEY-32E6.6, COL11A1B, MMP14B, MMP16B, MMP20B, ADAMTS1, SI:DKEY-6N6.1, ADAMTSL3, ADAMTS17, MMP28, POSTNB, HMCN2, COL15A1B, ABI3BPB, PAPLNB, PAPLNA, COL5A3A, MIA, COL22A1, COL10A1B, MMP13A, COL27A1B, MMP25B, WU:FC38H03, MMP25A, MMP30, MMP17A, COL28A2A, MMP9, SI:CH211-267E7.3, MARCO, COL18A1A, ADAMTS8A, MMP11B, COL4A4, SMOC1, MMP13B, COL2A1B, CCDC80L1, COL4A5, EMID1	3700	124	18136	1.77881	0.199422	0.0139008	0.0138012
GOTERM_BP_DIRECT	GO:0016584~nucleosome positioning	13	0.278611	0.000123007	ZGC:110425, SI:CH211-113A14.18, SI:CH73-368J24.11, SI:DKEY-23A13.9, ZGC:153405, SI:DKEY-261M9.12, H1-0, H1-10, SI:DKEY-108K21.10, SI:DKEY-23A13.17, SI:CH73-368J24.12, SI:CH211-113A14.24, BPTF	3700	20	18136	3.18605	0.33766	0.0242324	0.0240587
GOTERM_BP_DIRECT	GO:0048247~lymphocyte chemotaxis	17	0.364338	0.000180169	CCL44, CCL19B, CCL39.7, CCL34B.9, CCL38.1, CCL20A.3, CCL39.2, CCL35.1, CCL35.2, CCL20B, CCL25A, CCL25B, CCL34B.4, CCL19A.1, CCL34A.4, CCL34A.3, CCL38A.4	3700	32	18136	2.60399	0.453073	0.0317572	0.0315296
GOTERM_BP_DIRECT	GO:0071346~cellular response to interferon-gamma	17	0.364338	0.000180169	CCL44, CCL19B, CCL39.7, CCL34B.9, CCL38.1, CCL20A.3, CCL39.2, CCL35.1, CCL35.2, CCL20B, CCL25A, CCL25B, CCL34B.4, CCL19A.1, CCL34A.4, CCL34A.3, CCL38A.4	3700	32	18136	2.60399	0.453073	0.0317572	0.0315296
GOTERM_BP_DIRECT	GO:0048513~animal organ development	85	1.82169	0.000200449	LIMCH1B, LIMCH1A, TES, DGKB, CD248A, WNT6B, EFEMP2A, FHL5, NELL2A, LIMD2, JAG1B, JAG1A, LIMK1A, RASSF1, CSRP3, EFEMP1, NID2A, FBN2A, LIMA1A, LMCD1, TP63, LRP1AA, PRKCG, EGFL6, WNT9B, NRG1, EOMESB, KSR2, EOMESA, GMIP, SI:DKEY-90L8.3, ADGRE5B.3, ZGC:56628, PRKD2, ZFPM1, LRP1BB, ARHGAP45B, NRG3B, RASSF8B, FHL3A, FHL3B, TBX2A, ABLIM1B, WNT8A, NPNTA, NFAT5B, CRIP3, LDLRB, CITA, PRKCZ, FBLN5, TNS1B, RA…	3700	287	18136	1.4517	0.488993	0.0335653	0.0333247
GOTERM_BP_DIRECT	GO:0006935~chemotaxis	27	0.578654	0.00031019	RIPOR2, PTAFR, CCL38.1, CXCL19, CXCR3.1, CXCL20, CXCR3.2, CCR9A, RAC2, ZGC:195173, CXCL12B, CCL19A.1, CXCL12A, CCL38A.4, CCR8.1, ACKR4A, XCR1B.1, XCR1A.1, CXCL11.6, CCL20A.3, CXCL8A, CCL20B, CCR6A, CCR12B.2, CCR12B.1, CXCR4A, CXCR4B	3700	66	18136	2.00521	0.646187	0.047727	0.047385
GOTERM_BP_DIRECT	GO:0070374~positive regulation of ERK1 and ERK2 cascade	29	0.621517	0.000313525	CCL19B, CCL39.7, CCL38.1, DICP3.1, ARRB1, DICP2.2, CCL39.2, CCL35.1, DICP1.1, CD44B, CCL35.2, PDGFAA, PDGFAB, CCL25A, CCL25B, ALKAL1, CCL34B.4, CCL19A.1, CCL34A.4, CCL34A.3, CCL38A.4, ALKAL2B, CCL44, GPR183A, CCL34B.9, CCL20A.3, BMP5, PDGFBB, CCL20B	3700	73	18136	1.94722	0.650118	0.047727	0.047385
GOTERM_BP_DIRECT	GO:0021782~glial cell development	20	0.428633	0.000357032	EGR1, KMT2A, WT1B, LAMB4, APCDD1L, MYO6B, SNX19A, NFAT5B, SOX10, CUX2B, CDHR1A, CADM1B, PAX2A, SLITRK2, MMP28, TIMP2B, XIRP1, NAV1B, SYPB, CADM1A	3700	43	18136	2.27982	0.697573	0.0501383	0.049779
GOTERM_BP_DIRECT	GO:0006813~potassium ion transport	47	1.00729	0.000359307	HCN4, KCNG1, KCNQ1.1, KCNG2, KCNG3, KCNA4, KCNA7, KCNH6A, KCNMA1A, KCNF1B, ATP1A3A, KCNK5A, KCNH1B, KCNK3B, ATP1A1B, KCNJ1B, ATP1B1B, HCN2B, KCNAB2B, ATP1A3B, KCNK1B, KCNAB2A, KCNMB2, KCNN1A, SLC12A5A, SLC12A5B, KCNN1B, ATP1A1A.2, KCNH3, KCNJ5, KCND2, ABCC8, KCNH7, KCNJ14, KCNC3A, KCNA1B, KCNC1A, KCNJ11L, KCNH2A, KCNJ1A.6, KCNJ19B, KCNJ2A, ATP1A2A, KCNQ2A, KCNJ1A.1, SLC24A5, KCNV2A	3700	140	18136	1.64554	0.699869	0.0501383	0.049779
GOTERM_BP_DIRECT	GO:0071356~cellular response to tumor necrosis factor	18	0.385769	0.000412735	NFKBIAB, CCL44, CCL19B, CCL39.7, CCL34B.9, CCL38.1, CCL20A.3, CCL39.2, CCL35.1, CCL35.2, CCL20B, CCL25A, CCL25B, CCL34B.4, CCL19A.1, CCL34A.4, CCL34A.3, CCL38A.4	3700	37	18136	2.38457	0.749059	0.0539842	0.0535973
GOTERM_BP_DIRECT	GO:0002548~monocyte chemotaxis	17	0.364338	0.000435226	CCL44, CCL19B, CCL39.7, CCL34B.9, CCL38.1, CCL20A.3, CCL39.2, CCL35.1, CCL35.2, CCL20B, CCL25A, CCL25B, CCL34B.4, CCL19A.1, CCL34A.4, CCL34A.3, CCL38A.4	3700	34	18136	2.45081	0.767273	0.0539842	0.0535973
GOTERM_BP_DIRECT	GO:0071347~cellular response to interleukin-1	17	0.364338	0.000435226	CCL44, CCL19B, CCL39.7, CCL34B.9, CCL38.1, CCL20A.3, CCL39.2, CCL35.1, CCL35.2, CCL20B, CCL25A, CCL25B, CCL34B.4, CCL19A.1, CCL34A.4, CCL34A.3, CCL38A.4	3700	34	18136	2.45081	0.767273	0.0539842	0.0535973
GOTERM_BP_DIRECT	GO:0050804~modulation of synaptic transmission	18	0.385769	0.000871935	NLGN1, GRIK5, LRRC4.2, GRIK3, GRIK4, LRRC4.1, SI:CH211-251B21.1, NGFB, GRIN3BA, LRRC4CA, GRIK1B, NTF3, NLGN3A, GRID1B, GRIA4B, GRIA3A, CEL.1, GRIA3B	3700	39	18136	2.26229	0.946141	0.10429	0.103542
GOTERM_BP_DIRECT	GO:0030335~positive regulation of cell migration	23	0.492928	0.00091572	SI:CH211-129C21.1, SEMA3C, MYOC, SEMA6DL, SEMA6E, SEMA3B, KITA, PTK2AB, SEMA3E, FGF3, PDGFBB, FAM83HA, PDGFAA, SEMA3AB, SEMA5BA, FGF8A, SEMA3FA, SEMA4GA, PDGFAB, ZNF703, SEMA3GA, CXCL12B, CXCL12A	3700	56	18136	2.01317	0.953493	0.10575	0.104992
GOTERM_BP_DIRECT	GO:0051382~kinetochore assembly	8	0.171453	0.000975648	CENPT, SI:CH211-161H7.4, CENPW, CENPH, CENPK, CENPN, DLGAP5, CENPS	3700	10	18136	3.9213	0.961957	0.108915	0.108134
GOTERM_BP_DIRECT	GO:0006811~ion transport	155	3.3219	0.0011175	KCNG1, GLRBA, KCNG2, KCNG3, STEAP4, SCN1BA, SLC12A10.2, SLC12A10.1, SLC12A10.3, CACNA1SB, KCTD12.1, ATP6V0CA, TMEM266, KCNH1B, ATP1A1B, SLCO2B1, KCNAB2B, SI:CH211-261A10.5, KCNAB2A, SLC39A7, KCNK13A, SLC39A1, TTYH3B, SLC4A10A, CHRNB1, ATP6V1G1, KCNH7, CACNA2D2A, KCNK12, CACNA2D3, ATP6V1E1B, KCNC1A, CACNB1, KCNH2A, SLC9A5, ATP2B1B, ATP1A2A, TRPM4B.2, CACNA1BB, CACNA1BA, CHRNB1L, GRID1B, GRIA3A, ST…	3700	603	18136	1.25995	0.976355	0.119684	0.118826
GOTERM_BP_DIRECT	GO:0006956~complement activation	12	0.25718	0.00114359	C4B, SI:CH1073-280E3.1, C3A.6, CFBL, C6, C9, MASP1, C7A, C8B, C3B.1, C3A.2, C7B	3700	21	18136	2.80093	0.978335	0.119684	0.118826
GOTERM_BP_DIRECT	GO:0042742~defense response to bacterium	28	0.600086	0.00124529	PGLYRP5, TLR5B, LEAP2, PGLYRP6, NOD1, COCH, C6, DRAM1, DEFBL1, C9, LYGL2, RAC2, NKL.3, NKL.4, AEP1, NKL.1, CCL34A.4, GBP4, MPEG1.2, IL10, ACOD1, CCL20A.3, SI:CH211-1A19.2, TNFRSF1A, MARCO, IL1B, IL11A, HAMP	3700	75	18136	1.82994	0.984595	0.126378	0.125473
GOTERM_BP_DIRECT	GO:0007166~cell surface receptor signaling pathway	43	0.92156	0.00130142	ADGRL2A, GHRHRA, VIPR2, GIPR, ZGC:172120, CBLC, FZD10, ADGRG4A, VTCN1, SI:CH211-241B2.5, SI:DKEY-23A13.11, CELSR2, PTH3R, SI:DKEY-23A13.2, ADCYAP1R1A, ADGRG3, SI:DKEY-192G7.3, ADGRG11, FCER1GL, SI:DKEY-22I16.9, PTH2RA, FZD3A, ADGRE10, FZD9A, FZD9B, CD276, SI:CABZ01036022.1, SI:CH211-165F21.7, FZD5, ZGC:112965, ADGRB1A, LGALS17, ADGRF3A, P2RX7, SI:DKEY-169I5.4, ADGRE5B.3, SI:CH211-163C2.2, ADGRE5B…	3700	132	18136	1.59674	0.987238	0.128189	0.127271
GOTERM_BP_DIRECT	GO:0007204~positive regulation of cytosolic calcium ion concentration	27	0.578654	0.00144334	SI:DKEY-117A8.1, PTGER3, ADRA1D, KNG1, CXCR3.1, CXCR3.2, CCR9A, RXFP3.3A1, CCR10, CMKLR1, SI:DKEY-42L23.5, PTGIR, CCR8.1, SI:DKEY-42L23.7, ACKR4A, XCR1A.1, PTGER2A, AGTR1A, PTGER4A, PTGER1C, CCR6A, PTGER1A, CCR12B.2, CCR12B.1, CXCR4A, CXCR4B, ADRA1BB	3700	72	18136	1.83811	0.992071	0.138107	0.137117
GOTERM_BP_DIRECT	GO:0060041~retina development in camera-type eye	44	0.942992	0.00155225	FEN1, MYO6B, SNX19A, NFAT5B, TYMS, LMX1BB, ATP6V0CA, FGF3, PCDH17, CADM1B, PAX2A, ATOH7, CHAF1B, IRX1A, SLITRK2, FGF8A, MMP28, TIMP2B, XIRP1, SLC12A5B, ATP6V1H, NAV1B, CADM1A, ATP6V1F, TFAP2A, RFC5, EGR1, RFC4, WT1B, PLK1, LAMB4, APCDD1L, DMBX1A, ATP6AP1B, ATP6V1E1B, SOX10, CUX2B, CDHR1A, SYNJ1, MCM3, RDH5, CDK5R1B, MCM2, SYPB	3700	137	18136	1.57424	0.994497	0.141939	0.140922
GOTERM_BP_DIRECT	GO:0034765~regulation of ion transmembrane transport	45	0.964423	0.00156816	KCNG1, KCNQ1.1, KCNG2, KCNG3, SCN1BA, CACNA1SB, KCNA4, CLIC5A, KCNA7, KCNH6A, KCNMA1A, KCNF1B, KCNH1B, KCNJ1B, CLIC5B, SI:CH211-261A10.5, CACNA1AA, KCNK13A, SCN3B, CLIC2, KCNH3, KCNJ5, KCND2, CACNA2D2A, KCNH7, KCNK12, KCNJ14, CACNA2D3, CACNG8B, KCNC3A, KCNA1B, KCNC1A, KCNJ11L, CACNB1, KCNH2A, KCNJ1A.6, KCNJ19B, KCNJ2A, CACNA1HA, CACNA1DA, CACNA1BB, CACNA1BA, KCNQ2A, KCNJ1A.1, KCNV2A	3700	141	18136	1.56435	0.994783	0.141939	0.140922
GOTERM_BP_DIRECT	GO:0030574~collagen catabolic process	12	0.25718	0.0018682	MMP20B, MMP11B, MMP28, MMP13B, MMP13A, MMP14B, MMP25B, MMP25A, MMP16B, MMP17A, MMP30, MMP9	3700	22	18136	2.67361	0.998093	0.164647	0.163467
GOTERM_BP_DIRECT	GO:0010811~positive regulation of cell-substrate adhesion	8	0.171453	0.00220998	VIT, ECM2, EGFL6, SI:DKEY-32E6.6, SI:DKEY-6N6.1, CCDC80L1, AGR2, ABI3BPB	3700	11	18136	3.56482	0.999394	0.18503	0.183704
GOTERM_BP_DIRECT	GO:0099560~synaptic membrane adhesion	8	0.171453	0.00220998	LRRC4CA, PTPRFA, LRRC4.2, GPC6A, LRRC4.1, GPC6B, PTPRFB, PTPRSA	3700	11	18136	3.56482	0.999394	0.18503	0.183704
GOTERM_BP_DIRECT	GO:0019722~calcium-mediated signaling	20	0.428633	0.00238993	PPP1R9ALB, CCR8.1, ACKR4A, XCR1A.1, KSR2, CXCR3.1, CXCR3.2, SELENON, RCAN1A, CCR6A, CCR12B.2, CCR12B.1, CCR9A, RCAN2, RCAN3, RXFP3.3A1, CXCR4A, CXCR4B, CCR10, CMKLR1	3700	49	18136	2.00066	0.999669	0.195216	0.193817
GOTERM_BP_DIRECT	GO:0031640~killing of cells of other organism	9	0.192885	0.00272345	PRF1.6, C6, PRF1.2, C9, LYGL2, C7A, C8B, C7B, PRF1.9	3700	14	18136	3.15104	0.999892	0.217163	0.215607
GOTERM_BP_DIRECT	GO:0031101~fin regeneration	30	0.642949	0.00466157	FGFR1A, INHBAA, TTK, GATA3, JAG1B, LFNG, SOX2, ACTB1, NID2A, CTSBA, AGR1, CCN1, CXCL12A, ACANB, HSPA8, WT1A, COL22A1, WT1B, SERPINH1B, POU5F3, NRG1, ESCO2, KRT5, ATP6V1E1B, MMP9, TNFRSF1A, POLA2, KRT17, IL1B, ALDH1A2	3700	89	18136	1.65223	1	0.34638	0.343898
GOTERM_BP_DIRECT	GO:0009653~anatomical structure morphogenesis	58	1.24303	0.00468735	ADGRL2A, PIWIL1, SOX11B, GHRHRA, VIPR2, ADGRG4A, FOXM1, SOX2, SOX3, ADGRG11, SOX17, FBN2A, ADGRE10, FZD9A, FZD9B, FOXI3A, FOXD3, TBX3A, POU5F3, FOXL3, SOX12, ADGRF3A, ZFPM2B, SEMA5BA, FREM1B, FREM1A, ADGRE5B.3, ARMC5, ADGRE5B.2, ZFPM1, FREM3, SOX4A, GIPR, TBX2A, FOXQ1A, SEMA3H, NFAT5B, PTH3R, ADCYAP1R1A, FOXC1B, ADGRG3, FREM2B, TBX21, ATOH8, PTH2RA, FZD3A, FOXG1B, TBX1, FZD5, ADGRB1A, TBX19, NFKB…	3700	202	18136	1.4074	1	0.34638	0.343898
GOTERM_BP_DIRECT	GO:0031295~T cell costimulation	11	0.235748	0.0047018	SI:DKEY-169I5.4, SI:DKEY-192G7.3, HHLA2A.1, ZGC:112965, ZGC:172120, HHLA2A.2, SI:DKEY-22I16.9, LGALS17, VTCN1, SI:CH211-241B2.5, CD276	3700	21	18136	2.56752	1	0.34638	0.343898
GOTERM_BP_DIRECT	GO:0048246~macrophage chemotaxis	9	0.192885	0.00479852	P2RX7, CXCR3.2, WT1A, WT1B, IL1B, MMP13A, RAC2, DUOX, CYBA	3700	15	18136	2.94097	1	0.34638	0.343898
GOTERM_BP_DIRECT	GO:0006958~complement activation, classical pathway	10	0.214316	0.00486111	SI:CH1073-280E3.1, CFBL, C6, C1R, C9, IGHD, C7A, C8B, SI:CH211-1A19.2, C7B	3700	18	18136	2.72312	1	0.34638	0.343898
GOTERM_BP_DIRECT	GO:0055113~epiboly involved in gastrulation with mouth forming second	20	0.428633	0.00517868	CLDNE, PCDH18A, SATB2, CACNB4B, APOA2, POU5F3, SLC39A10, LTB4R2A, CELSR2, SDCBP2, CTHRC1A, LTB4R, PRNPB, CDH1, CFL1, CYTH1B, LTA4H, RHOV, PFN1, MAP9	3700	52	18136	1.88524	1	0.361321	0.358732
GOTERM_BP_DIRECT	GO:0007059~chromosome segregation	21	0.450064	0.00562632	TOP2A, CENPT, CENPW, RAD21L1, TTK, SKA3, KNSTRN, SKA1, NDC80, SI:DKEY-211G8.4, AURKB, SGO1, ESPL1, CENPH, SI:DKEY-6I22.5, OIP5, NEK2, BANF1, CENPN, SPC24, DLGAP5	3700	56	18136	1.83811	1	0.384542	0.381786
GOTERM_BP_DIRECT	GO:0071805~potassium ion transmembrane transport	35	0.750107	0.00591555	HCN4, KCNG1, KCNQ1.1, KCNG2, KCNG3, KCNA4, KCNH6A, KCNMA1A, KCNF1B, KCNK5A, KCNH1B, KCNK3B, HCN2B, KCNK1B, SI:CH211-261A10.5, KCNN1A, KCNN1B, KCNK13A, KCNH3, KCND2, KCNH7, KCNK12, KCNJ14, KCNC3A, KCNA1B, KCNC1A, TMEM175, KCNH2A, KCNK4A, SLC9A5, KCNJ2A, KCNK2B, KCNQ2A, KCNJ1A.1, KCNV2A	3700	110	18136	1.55961	1	0.396224	0.393384
GOTERM_BP_DIRECT	GO:0042130~negative regulation of T cell proliferation	11	0.235748	0.00706313	SI:DKEY-169I5.4, SI:DKEY-192G7.3, HHLA2A.1, ZGC:112965, ZGC:172120, HHLA2A.2, SI:DKEY-22I16.9, LGALS17, VTCN1, SI:CH211-241B2.5, CD276	3700	22	18136	2.45081	1	0.440861	0.437701
GOTERM_BP_DIRECT	GO:0042632~cholesterol homeostasis	14	0.300043	0.00713936	ABCG8, APOA1B, APOBA, EPHX2, ZGC:162608, APOA4B.1, LDLRB, CYP7B1, APOBB.1, APOBB.2, APOA4A, SPX, LAMTOR1, ABCG4B	3700	32	18136	2.14446	1	0.440861	0.437701
GOTERM_BP_DIRECT	GO:0001654~eye development	26	0.557222	0.00720325	MEIS2A, HER15.2, MVP, WNT8A, TYMS, CORO1A, ATOH7, PBX1B, PBX3B, SIX7, PAX6B, HIF1AL, MYB, COL15A1B, CYP1B1, SIL1, SCINLA, SLC7A14A, MEIS1A, PCDH15B, TMX3A, DMBX1A, MFRP, SFRP5, SMOC1, SIX6B	3700	76	18136	1.67687	1	0.440861	0.437701
GOTERM_BP_DIRECT	GO:0050919~negative chemotaxis	16	0.342906	0.00724017	RTN4R, VASNA, LRRC15, SI:CH211-129C21.1, SEMA3C, SEMA6DL, SEMA6E, SEMA3B, SEMA3H, SEMA3E, SEMA3AB, LRTM2A, SEMA3FA, SEMA4GA, CHAD, SEMA3GA	3700	39	18136	2.01092	1	0.440861	0.437701
GOTERM_BP_DIRECT	GO:0006096~glycolytic process	16	0.342906	0.00724017	GPIB, PFKLB, PKLR, ADPGK, ENO1B, PGAM2, PKMA, ENO3, HK2, GCK, ALDOCB, PKMB, HKDC1, TPI1A, GAPDHS, PGAM1A	3700	39	18136	2.01092	1	0.440861	0.437701
GOTERM_BP_DIRECT	GO:0000727~double-strand break repair via break-induced replication	8	0.171453	0.00781613	GINS2, CDC45, GINS4, MCM3, MCM4, MCM5, MCM6, MCM2	3700	13	18136	3.01638	1	0.46397	0.460645
GOTERM_BP_DIRECT	GO:0071456~cellular response to hypoxia	9	0.192885	0.00789677	EGLN3, EGLN2, HIF1AL, EPAS1A, EPAS1B, HYOU1, HIF1AA, EGLN1A, EGLN1B	3700	16	18136	2.75716	1	0.46397	0.460645
GOTERM_BP_DIRECT	GO:0009617~response to bacterium	26	0.557222	0.00864276	NITR4A, SI:CH1073-280E3.1, CEBPB, NITR6A, NITR6B, PCNA, NITR2A, NITR2B, RHOGB, CXCR3.2, HNF4A, DUOX, LTA4H, NITR7B, CXCL8A, MMP9, TRADV6.0.1, TNFRSF1A, F5, SAA, CFBL, TRADV36.2.12, IL1B, MXA, HAMP, CXCR4B	3700	77	18136	1.65509	1	0.499045	0.495469
GOTERM_BP_DIRECT	GO:0045087~innate immune response	48	1.02872	0.00893787	SI:CH1073-280E3.1, SI:CH211-113A14.19, TLR5B, HIST1H2A4, NOD1, TLR20.2, SI:CH211-66K16.27, PTX3A, C8B, HIST1H2A1, PTK2BB, HIST1H2A3, WFDC2, HIST1H2A2, STYK1B, CXCR3.2, C6, SI:CH73-206D17.1, CAIAP, DEFBL1, C9, MSRB1A, GBP2, GBP1, GBP4, TLR8A, SRMS, RSAD2, TNK2B, FYNA, TRIM62.1, PTK2AB, SI:DKEY-118K5.3, SI:DKEY-108K21.19, HIST1H2A11, C7A, SI:CH211-1A19.2, TNFRSF1A, C7B, TLR1, ZAP70, CFBL, LCK, TLR4…	3700	166	18136	1.41734	1	0.502717	0.499114
GOTERM_BP_DIRECT	GO:0007018~microtubule-based movement	29	0.621517	0.00909376	DNAH5, DNAH6, KIF14, KIF1AA, KIF1AB, ZGC:56231, KIF11, KIF15, KIF20BB, KIF20BA, KIF19, KIF21A, KIF26BB, DNAH5L, KIF26BA, KIF22, KIF6, DYNC1I2A, TCTE1, KIF4, CENPE, KIF9, KIF18A, KIFC1, KIF2C, KIF20A, KIF26AA, KIFC3, KIF13BB	3700	89	18136	1.59716	1	0.502717	0.499114
GOTERM_BP_DIRECT	GO:0001666~response to hypoxia	22	0.471496	0.00915668	VEGFAA, HMOX1A, HBAA1, VEGFBA, HSPA5, NGB, VEGFC, G0S2, EPAS1B, SDCBP2, IGFBP1A, HSP90B1, LDHA, IRS2A, XGB, ALKBH5, REST, LOXL2A, HIF1AL, DDIT4, FOXO3B, NCAM2	3700	62	18136	1.73929	1	0.502717	0.499114
GOTERM_BP_DIRECT	GO:0043049~otic placode formation	11	0.235748	0.0102454	TFAP2A, PAX2A, SOX3, SOX9A, FGF8A, MSX3, HNF1BA, FSTA, GATA3, DLX3B, FGF3	3700	23	18136	2.34425	1	0.552802	0.548841
GOTERM_BP_DIRECT	GO:0001708~cell fate specification	17	0.364338	0.0103991	APC2, TBX1, HOXB5A, TBX2B, TBX2A, TBX3A, EOMESB, EOMESA, TBX4, TBX19, FGF3, TBX16, PAX2A, HEY1, FGF8A, TBX21, CDKN1CA	3700	44	18136	1.89381	1	0.552802	0.548841
GOTERM_BP_DIRECT	GO:0098609~cell-cell adhesion	45	0.964423	0.0106143	SI:DKEY-22O22.2, ITGA6A, NEO1A, VCAM1B, KIRREL1B, ICAM3, TJP1B, ZGC:174863, CTNND2B, CELSR2, ARVCFA, CDH6, SI:CH211-66E2.3, CNTN1A, SRPX2, MPZL2B, ESAMA, ITGA2.2, CDH1, CDH26.1, L1CAMB, NFASCA, SI:DKEY-24P1.1, CDH27, CDH28, CDH7A, PCDH15B, ITGAE.2, ITGA3B, ITGA1, PKP3A, CDHR5B, DLG4B, CDHR1A, DLG2, JAM2A, ITGA8, ITGA11A, PKP2, FAT2, IGSF9B, SI:CH211-186J3.6, CDH17, TJP3, ITGA9	3700	155	18136	1.42305	1	0.555426	0.551446
GOTERM_BP_DIRECT	GO:0019985~translesion synthesis	6	0.12859	0.0113268	PCNA, POLN, PCLAF, POLI, DTL, PRIMPOL	3700	8	18136	3.67622	1	0.583589	0.579407
GOTERM_BP_DIRECT	GO:0071222~cellular response to lipopolysaccharide	19	0.407201	0.0119492	CXCL18B, ZGC:112965, IL13, ZGC:172120, LGALS17, CXCL19, CXCL11.6, VTCN1, CXCL8A, SI:CH211-241B2.5, CXCL20, SI:DKEY-169I5.4, SI:DKEY-192G7.3, HHLA2A.1, IL1B, SHPK, HHLA2A.2, SI:DKEY-22I16.9, CD276	3700	52	18136	1.79098	1	0.606331	0.601986
GOTERM_BP_DIRECT	GO:0051014~actin filament severing	9	0.192885	0.0122828	GSNB, CAPGB, SCIN, CFL1L, CFL2, CFL1, SCINLA, GSNA, SCINLB	3700	17	18136	2.59498	1	0.613957	0.609557
GOTERM_BP_DIRECT	GO:0007076~mitotic chromosome condensation	7	0.150021	0.0128228	NUSAP1, NCAPG, NCAPD2, NCAPD3, SMC4, NCAPH, SMC2	3700	11	18136	3.11921	1	0.62498	0.620501
GOTERM_BP_DIRECT	GO:0007094~mitotic spindle assembly checkpoint	8	0.171453	0.0129088	ZWILCH, KNTC1, TTK, SPDL1, BUB3, BUB1, AURKB, MAD2L1	3700	14	18136	2.80093	1	0.62498	0.620501
GOTERM_BP_DIRECT	GO:1990573~potassium ion import across plasma membrane	21	0.450064	0.0130632	KCNH3, SLC12A3, KCNJ5, SLC12A10.2, SLC12A10.1, SLC12A10.3, KCNJ14, KCNJ11L, ATP1A3A, KCNJ1A.6, KCNJ2A, KCNJ19B, ATP1A1B, KCNJ1B, ATP1B1B, ATP1A2A, ATP1A3B, SLC12A5A, SLC12A5B, KCNJ1A.1, ATP1A1A.2	3700	60	18136	1.71557	1	0.62498	0.620501
GOTERM_BP_DIRECT	GO:0007189~adenylate cyclase-activating G-protein coupled receptor signaling pathway	35	0.750107	0.013985	ADGRL2A, ADCY1A, ADCY3B, DRD1B, PTGER3, ADGRG4A, ADCY8, RXFP1, MC5RA, CNR2, ADGRG11, S1PR3A, S1PR5B, PTH2RA, ADGRE10, S1PR4, ADCY2A, PTGIR, ADGRB1A, ADMA, ADGRF3A, ADCY6B, PTGER2A, ADM2B, TSHR, PTGER4A, PTGER1C, LPAR2A, PTGER1A, LPAR2B, ADGRE5B.3, ADGRE5B.2, GHRH, ADGRD2, RXFP2A	3700	116	18136	1.47894	1	0.658481	0.653762
GOTERM_BP_DIRECT	GO:0030318~melanocyte differentiation	15	0.321474	0.0141652	TFAP2A, OCA2, FOXD3, LTK, TFAP2E, KITA, DICER1, MITFA, TYR, SOX10, TYRP1A, LRMDA, KITLGA, ECE2B, SLC24A5	3700	38	18136	1.93485	1	0.658481	0.653762
GOTERM_BP_DIRECT	GO:0008284~positive regulation of cell proliferation	31	0.664381	0.0144666	FGFR1A, MEIS2A, TGFA, TCF7L1B, FGF18B, FGF6A, GATA3, PTK2BB, FGF3, PDGFAA, CSF3A, CSF3B, FGF8A, KITLGA, PDGFAB, FGF21, MEIS1A, TBX3A, IGF3, PTK2AB, IGF1, S100B, PDGFBB, IL6, MYCH, GHRH, CDK2, IL11B, IL11A, ERBB3A, FGFR3	3700	100	18136	1.5195	1	0.658481	0.653762
GOTERM_BP_DIRECT	GO:0006936~muscle contraction	19	0.407201	0.0147224	MYHA, MYHB, TNNI4A, MYLPFA, COL22A1, MYOM2A, MYHZ1.1, MYHC4, CALD1B, LMOD3, LSP1B, CACNB1, TNNT2D, LMOD1A, LMOD1B, LMOD2A, TNNT2C, TPMA, DESMB	3700	53	18136	1.75719	1	0.658481	0.653762
GOTERM_BP_DIRECT	GO:0048843~negative regulation of axon extension involved in axon guidance	13	0.278611	0.0147465	ROBO2, SI:CH211-129C21.1, SEMA3C, SEMA6DL, SEMA6E, SEMA3B, SEMA3H, SEMA3E, SEMA3AB, SEMA5BA, SEMA3FA, SEMA4GA, SEMA3GA	3700	31	18136	2.05552	1	0.658481	0.653762
GOTERM_BP_DIRECT	GO:0006695~cholesterol biosynthetic process	10	0.214316	0.0162941	SI:CH1073-429I10.1, MVK, HMGCS1, APOA1B, INSIG1, ZGC:162608, HSD17B7, TM7SF2, CYP51, FDFT1	3700	21	18136	2.33411	1	0.718012	0.712867
GOTERM_BP_DIRECT	GO:0051897~positive regulation of protein kinase B signaling	12	0.25718	0.0170697	PDGFAA, PDGFBB, DDR1, PDGFAB, IGF3, ROR1, IGF1, TEK, MET, NTRK2A, MST1RA, NTRK2B	3700	28	18136	2.10069	1	0.732901	0.727649
GOTERM_BP_DIRECT	GO:0007052~mitotic spindle organization	12	0.25718	0.0170697	STIL, CENPH, NUF2, PLK1, SASS6, LRMP, DYNC1I2A, AURKB, DLGAP5, NDC80, KIF4, AURKA	3700	28	18136	2.10069	1	0.732901	0.727649
GOTERM_BP_DIRECT	GO:0030036~actin cytoskeleton organization	37	0.79297	0.017532	FMNL2B, ZGC:109889, FHL3A, FHL3B, ACTN3A, ACTN3B, THSD7BB, SMTNL, AMOT, PARD3AB, CSRP3, LIMK1A, PDLIM2, CSRP1B, KLF6A, SPTBN4A, XIRP1, FLNCA, PDLIM7, VASPA, IQSEC3A, PDLIM3A, IQSEC1B, AMOTL2B, DIAPH3, DAAM2, LDB3A, CAPZA1B, LDB3B, TAGLN2, PFN1, WASF3B, ZGC:165653, SPECC1LB, EHD2A, SI:DKEYP-23E4.3, SMTNL1	3700	126	18136	1.43937	1	0.743222	0.737896
GOTERM_BP_DIRECT	GO:1902975~mitotic DNA replication initiation	5	0.107158	0.0181889	POLA1, GINS3, MCM3, MCM4, MCM2	3700	6	18136	4.08468	1	0.753325	0.747927
GOTERM_BP_DIRECT	GO:1990266~neutrophil migration	9	0.192885	0.0182202	SI:CH211-226H7.5, SAA, ZGC:153932, RAC2, NOX5, CYBA, CXCL8A, SI:DKEYP-110A12.4, SI:CH211-226H7.3	3700	18	18136	2.45081	1	0.753325	0.747927
GOTERM_BP_DIRECT	GO:0071391~cellular response to estrogen stimulus	13	0.278611	0.0193108	FKBP11, VTG1, VTG5, SSR4, SERPINC1, UCP1, HPXA, LMAN1, C9, PAH, AQP12, FBP1B, C3A.2	3700	32	18136	1.99128	1	0.77044	0.764919
GOTERM_BP_DIRECT	GO:0071466~cellular response to xenobiotic stimulus	13	0.278611	0.0193108	TCNBB, NQO1, HMOX1A, CPB1, NT5C2L1, TIPARP, ZGC:77439, HIPK3A, SORT1B, AHRRA, ATP6V0A1B, APOBB.1, CYP1A	3700	32	18136	1.99128	1	0.77044	0.764919
GOTERM_BP_DIRECT	GO:0051301~cell division	55	1.17874	0.0193243	ERCC6L, ZWILCH, NCAPG2, CCNF, KIF11, CKS1B, SPARTA, CDC14AB, NUF2, NUSAP1, OIP5, SPDL1, CDCA7A, BORA, HAUS3, HAUS6, KNL1, MASTL, SI:DKEY-25O16.4, SGO1, ASPM, CCNE1, CDC37, CKS2, ANAPC5, CDCA5, CDCA8, NCAPG, TTK, SKA3, SKA1, NCAPH, CCNB3, CCNB2, PARD3AB, DSN1, CCNB1, CDC45, RAB11FIP4B, LZTS2A, RBBP8, MCMBP, FSD1, MAPRE1A, PLK1, CDC6, NDC80, SI:DKEY-6I22.5, CENPJ, CDK1, NCAPD2, NCAPD3, SPC24, SPECC…	3700	203	18136	1.32803	1	0.77044	0.764919
GOTERM_BP_DIRECT	GO:0033627~cell adhesion mediated by integrin	14	0.300043	0.0211651	ITGAE.2, ITGA6A, ITGB3A, ITGA3B, ITGA1, ITGA2.2, ITGA11A, ITGA8, ITGB1B.1, ITGBL1, ITGB8, ITGB7, ITGB6, ITGA9	3700	36	18136	1.90619	1	0.7916	0.785928
GOTERM_BP_DIRECT	GO:0030168~platelet activation	6	0.12859	0.0212365	FGB, FGA, P2RY1, BAMBIA, LRRC32, F2	3700	9	18136	3.26775	1	0.7916	0.785928
GOTERM_BP_DIRECT	GO:0086091~regulation of heart rate by cardiac conduction	6	0.12859	0.0212365	KCNH2A, SCN1BA, KCNH7, KCNE4, SCN3B, KCNH6A	3700	9	18136	3.26775	1	0.7916	0.785928
GOTERM_BP_DIRECT	GO:0051252~regulation of RNA metabolic process	7	0.150021	0.0212732	IGF2BP2A, PCBP4, NOVA1, IGF2BP1, IGF2BP3, IFNLR1, IGF2BP2B	3700	12	18136	2.85928	1	0.7916	0.785928
GOTERM_BP_DIRECT	GO:0018401~peptidyl-proline hydroxylation to 4-hydroxy-L-proline	7	0.150021	0.0212732	ZGC:152670, EGLN3, EGLN2, P4HA2, P4HA1B, EGLN1A, EGLN1B	3700	12	18136	2.85928	1	0.7916	0.785928
GOTERM_BP_DIRECT	GO:0050930~induction of positive chemotaxis	7	0.150021	0.0212732	VEGFAA, VEGFBA, VEGFC, IL16, CXCL12B, CXCL12A, CXCR4B	3700	12	18136	2.85928	1	0.7916	0.785928
GOTERM_BP_DIRECT	GO:0007229~integrin-mediated signaling pathway	20	0.428633	0.0222377	ITGAE.2, ITGA6A, ITGB3A, ITGAE.1, ITGA3B, ITGA1, FERMT3A, ADAM28, FERMT3B, ITGA2.2, ITGA11A, ITGA8, ITGB1B.1, ZYX, ITGBL1, ITGB8, ITGB7, ITGB6, ADAM8A, ITGA9	3700	59	18136	1.66157	1	0.814734	0.808895
GOTERM_BP_DIRECT	GO:0007275~multicellular organism development	29	0.621517	0.0223815	DDR1, RET, FGFR1A, LTK, GREB1L, EK1, CDH6, PDGFAA, EPHB3A, CDH1, CDH26.2, CDH26.1, FSTL1A, FSTL1B, FSTA, CDH28, KITA, CDHR5B, NTRK2A, NTRK2B, MST1RA, EPHA4B, EPHB4A, ROR1, ERBB3A, TEK, FGFR3, CDH17, MET	3700	95	18136	1.49628	1	0.814734	0.808895
GOTERM_BP_DIRECT	GO:0048468~cell development	34	0.728676	0.0236163	ARHGAP45B, DGKB, SEMA3H, CITA, PRKCZ, TNS1B, RASGRP4, JAG1B, JAG1A, RASSF1, IRX1A, RACGAP1, ARHGEF28A, PRKCG, MKXA, SEMA6A, PROX3, SEMA6E, SEMA6DL, SEMA4F, MYO9B, BRAF, CDC42BPB, TNS2A, MKXB, GMIP, DLK2, IRX6A, SEMA5BA, VCANB, IRX2A, IRX4A, CDC42BPAB, PRKD2	3700	116	18136	1.43668	1	0.850442	0.844348
GOTERM_BP_DIRECT	GO:0043547~positive regulation of GTPase activity	32	0.685812	0.0244702	RASGRF2B, RGL3A, SI:CH211-129C21.1, CCL19B, CCL39.7, CCL38.1, CCL39.2, CCL35.1, RASGRP4, CCL35.2, PREX2, SH3BP1, CCL25A, CCL25B, RGS8, CCL34B.4, CCL19A.1, CCL34A.4, ARAP1A, CCL34A.3, RASGEF1BA, RGS6, CCL38A.4, RASGEF1BB, SI:DKEY-191G9.5, CCL44, ELMOD1, CCL34B.9, CCL20A.3, IQSEC1B, BCR, CCL20B	3700	108	18136	1.45233	1	0.871815	0.865568
GOTERM_BP_DIRECT	GO:0007049~cell cycle	74	1.58594	0.0251322	H2AX, ERCC6L, SUV39H1B, SUV39H1A, ZWILCH, MCM8, DSCC1, NCAPG2, KDM8, CCNF, KIF11, SMC4, CKS1B, SMC2, CHAF1A, CDC14AB, NUF2, NUSAP1, OIP5, SPDL1, CDCA7A, TP63, BORA, HAUS3, HAUS6, ESCO2, MASTL, TERF1, SGO1, MELK, CCNE1, CDC37, CKS2, MCM3, MCM4, MCM5, ANAPC5, MCM6, MCM2, UHRF1, CDCA5, CDCA8, NCAPG, TTK, SKA3, SKA1, NCAPH, CCNB3, CCNB2, PARD3AB, CCNB1, BRINP2, CDC45, BRINP1, RAB11FIP4B, LZTS2A, BRIN…	3700	289	18136	1.25509	1	0.885977	0.879628
GOTERM_BP_DIRECT	GO:0035622~intrahepatic bile duct development	9	0.192885	0.0259566	JAG1B, CDK5R1A, DNMT1, ZEB2B, SNAPC4, VPS33B, HNF1BA, PRICKLE1A, RARGB	3700	19	18136	2.32182	1	0.902947	0.896476
GOTERM_BP_DIRECT	GO:0061386~closure of optic fissure	11	0.235748	0.0263132	PAX2A, SOX11B, FGF8A, NID2A, SFRP5, TFEC, NTN1A, LMX1BB, MITFA, NTN2, SOX4A	3700	26	18136	2.07376	1	0.902947	0.896476
GOTERM_BP_DIRECT	GO:0007043~cell-cell junction assembly	14	0.300043	0.0266921	CDH7A, PKP3A, CTNND2B, CDHR5B, ARVCFA, CDH6, CDH1, CDH26.2, MUC13B, CDH26.1, PKP2, CDH17, CDH28, SI:CH211-198M17.1	3700	37	18136	1.85467	1	0.902947	0.896476
GOTERM_BP_DIRECT	GO:0001817~regulation of cytokine production	14	0.300043	0.0266921	IL10, ZBTB25, ZGC:112965, ZGC:172120, ZBTB16A, ZNFL2A, ZGC:174863, TLR1, SI:DKEY-169I5.4, SI:DKEY-192G7.3, BCL6B, BCL6AB, CD276, TLR2	3700	37	18136	1.85467	1	0.902947	0.896476
GOTERM_BP_DIRECT	GO:0002376~immune system process	36	0.771539	0.0286124	PGLYRP5, SI:CH1073-280E3.1, TLR5B, IRF1B, PGLYRP6, NOD1, TLR20.2, TAPBPL, C8B, CXCR3.2, DHRS13B.2, C6, CAIAP, SI:BUSM1-194E12.8, C9, MSRB1A, GBP2, GBP1, GBP4, TLR8A, RSAD2, GPR183A, THEMIS, SI:DKEY-118K5.3, C7A, C7B, TLR1, ZAP70, CFBL, INPPL1B, TLR4BB, IRF10, SI:CH211-209N20.1, IRF6, MASP1, TLR2	3700	126	18136	1.40046	1	0.928111	0.92146
GOTERM_BP_DIRECT	GO:0007159~leukocyte cell-cell adhesion	4	0.0857265	0.0287315	FERMT3A, FERMT3B, JAM2A, JAM2B	3700	4	18136	4.90162	1	0.928111	0.92146
GOTERM_BP_DIRECT	GO:0019370~leukotriene biosynthetic process	4	0.0857265	0.0287315	ALOX5AP, MGST2, LTA4H, LTC4S	3700	4	18136	4.90162	1	0.928111	0.92146
GOTERM_BP_DIRECT	GO:0060326~cell chemotaxis	16	0.342906	0.0292574	DOCK4, CCR8.1, ACKR4A, XCR1A.1, CXCR3.1, RHOGB, CXCR3.2, CCR6A, CCR12B.2, CCR12B.1, CCR9A, RXFP3.3A1, CXCR4A, CXCR4B, CCR10, CMKLR1	3700	45	18136	1.7428	1	0.928111	0.92146
GOTERM_BP_DIRECT	GO:0050935~iridophore differentiation	8	0.171453	0.0294231	TFAP2A, OCA2, FOXD3, LTK, ALKAL1, TYR, SOX10, ALKAL2B	3700	16	18136	2.45081	1	0.928111	0.92146
GOTERM_BP_DIRECT	GO:0030177~positive regulation of Wnt signaling pathway	8	0.171453	0.0294231	GRK5, FGF8A, SFRP5, SULF2A, RSPO2, RSPO1, SULF1, FGF3	3700	16	18136	2.45081	1	0.928111	0.92146
GOTERM_BP_DIRECT	GO:0006261~DNA-dependent DNA replication	8	0.171453	0.0294231	RFC5, WDHD1, RFC4, POLN, POLD1, POLE2, GINS4, MCMBP	3700	16	18136	2.45081	1	0.928111	0.92146
GOTERM_BP_DIRECT	GO:0000278~mitotic cell cycle	28	0.600086	0.029653	SKA3, SKA1, AURKA, TUBA1C, CHAF1B, TUBA1A, MYB, POLE, MAP9, PLK4, CENPT, WDHD1, CENPW, PLK1, ESCO2, MYBL2B, MASTL, TUBB4B, EWSR1B, CENPE, ASPM, TUBB2B, CENPF, TUBA2, SI:CH211-114N24.6, NCAPD2, MCM5, MCPH1	3700	93	18136	1.47576	1	0.928111	0.92146
GOTERM_BP_DIRECT	GO:0048856~anatomical structure development	94	2.01457	0.0325457	ETV5A, CNTNAP3, TENM1, PTGS2B, TENM4, IRF1B, QKI2, SI:CH73-368J24.11, ADAM23A, FOXP1B, LAMC2, ZGC:153405, NAGPA, ATRAID, ETS2, H1-10, PAX2A, PREX2, CUL5B, COMP, SI:DKEY-108K21.21, ZEB2B, TNN, PAX6B, CNTNAP5A, HNF4A, STAB1, SI:CH73-368J24.12, MALRD1, ARID2, SCARF1, HABP2, RGS6, ADAM8A, SI:CH211-158D24.2, RAD21L1, RFX7A, PAX5, NRXN1A, SI:DKEYP-97E7.9, ETV7, CNTNAP2B, NTNG1A, SI:DKEY-108K21.10, DEPD…	3700	382	18136	1.20616	1	0.964466	0.957555
GOTERM_BP_DIRECT	GO:0007131~reciprocal meiotic recombination	7	0.150021	0.0328079	ZGC:194246, RAD51D, MSH4, RAD54L, MND1, TRIP13, RAD54B	3700	13	18136	2.63933	1	0.964466	0.957555
GOTERM_BP_DIRECT	GO:0070527~platelet aggregation	7	0.150021	0.0328079	FGB, FGA, FERMT3A, FERMT3B, ESAMA, ITGB3A, FN1B	3700	13	18136	2.63933	1	0.964466	0.957555
GOTERM_BP_DIRECT	GO:0035556~intracellular signal transduction	122	2.61466	0.0339041	ADCY1A, GUCY1B2, DGKB, ZGC:194906, SI:CH211-214B16.2, SI:RP71-7L19.2, PREX2, RPS6KA5, SI:DKEY-26M3.3, CHEK1, PLCE1, ASB2B, SI:CH211-238E22.8, RGS6, SOCS3B, PRKCG, ADCY2A, SOCS3A, SI:CH211-76M11.8, CISH, PASK, SI:CH73-168D20.1, SI:DKEYP-97E7.9, BCR, MELK, DEPDC1A, DCLK1A, MAPKAPK3, SI:DKEY-29J8.1, SIK3, SI:CH211-76M11.3, SIK1, KMT2A, DAPK2A, PRKCZ, ZGC:171775, RACGAP1, SNRKB, PLCD3A, STK38L, NRBP2…	3700	509	18136	1.17485	1	0.964466	0.957555
GOTERM_BP_DIRECT	GO:0042102~positive regulation of T cell proliferation	11	0.235748	0.0343512	SI:DKEY-169I5.4, SI:DKEY-192G7.3, HHLA2A.1, ZGC:112965, ZGC:172120, HHLA2A.2, SI:DKEY-22I16.9, LGALS17, VTCN1, SI:CH211-241B2.5, CD276	3700	27	18136	1.99696	1	0.964466	0.957555
GOTERM_BP_DIRECT	GO:0050808~synapse organization	11	0.235748	0.0343512	DLG2, SYNJ1, CACNA1FA, L1CAMA, PPFIBP1A, CACNA1DA, NCAM3, NCAM1B, DLG4B, IL1RAPL1B, PPFIA2	3700	27	18136	1.99696	1	0.964466	0.957555
GOTERM_BP_DIRECT	GO:0006508~proteolysis	131	2.80754	0.0352379	SI:CH1073-280E3.1, OTUD4, TRHDE.2, PRSS1, ADAM23A, PREP, HP, MMP14B, SI:DKEY-33M11.8, HTRA1B, SI:DKEY-78L4.7, ZGC:152830, CAPN9, CTSS2.1, CTSBA, CTSS1, ECE2B, HABP2, ADAM8A, ADGB, CTSLA, F2R, ZGC:136971, SDCBP2, ASRGL1, SI:CH211-267E7.3, ACE2, USP43A, KEL, RBP3, SI:CH73-127M5.1, DPEP2, CAPN2L, MASP1, CFD, CPB1, CAPN3B, HPN, ACTMAP, CELA1.6, DPP3, DPP4, SDCBP, ADAMTS17, LTA4H, CPA4, TMPRSS13A, MMP…	3700	551	18136	1.16536	1	0.964466	0.957555
GOTERM_BP_DIRECT	GO:0007399~nervous system development	63	1.35019	0.0352857	NRSN1, MDGA2A, IGF2BP2A, NEURL1AB, LEPA, IGF2BP2B, UNCX4.1, LFNG, PAX2A, IRX1A, EFNB2A, DPF3, ENC3, UNC119.2, CHAC1, APC2, NPAS4A, RBFOX1, SEMA6A, PROX3, INAA, NRP2A, NRG1, DNAAF4, GFRA3, INSM1B, GFRA2A, ACVR1BB, ERBB3A, MET, PPP1R9ALB, UNC119B, NEO1A, NRG3B, PLPPR1, SEMA3C, NRN1A, SEMA3AB, ATOH7, NEUROD2, BRINP2, EPHB3A, L1CAMA, GFRA1A, ATOH8, LDB2A, NCAM3, IGF2BP1, CSPG5A, FN1B, L1CAMB, IGF2BP3…	3700	245	18136	1.26042	1	0.964466	0.957555
GOTERM_BP_DIRECT	GO:0009605~response to external stimulus	6	0.12859	0.0354389	SEMA5BA, SEMA6A, SEMA6DL, SEMA6E, SEMA3H, SEMA4F	3700	10	18136	2.94097	1	0.964466	0.957555
GOTERM_BP_DIRECT	GO:0035701~hematopoietic stem cell migration	6	0.12859	0.0354389	SELP, CEBPA, CNR2, MYB, CXCL12A, MMP9	3700	10	18136	2.94097	1	0.964466	0.957555
GOTERM_BP_DIRECT	GO:1905606~regulation of presynapse assembly	6	0.12859	0.0354389	SLITRK2, SLITRK4, SLITRK6, GPC6A, SI:CH211-159I8.4, GPC6B	3700	10	18136	2.94097	1	0.964466	0.957555
GOTERM_BP_DIRECT	GO:0043542~endothelial cell migration	6	0.12859	0.0354389	LOXL2A, KLF6A, PLEKHG5B, PLEKHG6, LPXN, TAGLN2	3700	10	18136	2.94097	1	0.964466	0.957555
GOTERM_BP_DIRECT	GO:0031638~zymogen activation	6	0.12859	0.0354389	SI:DKEY-14D8.20, C1R, SI:CH73-127M5.1, MMP14B, MASP1, SI:CH211-51A6.2	3700	10	18136	2.94097	1	0.964466	0.957555
GOTERM_BP_DIRECT	GO:0046835~carbohydrate phosphorylation	6	0.12859	0.0354389	FGGY, HKDC1, GALK2, HK2, GCK, GALK1	3700	10	18136	2.94097	1	0.964466	0.957555
GOTERM_BP_DIRECT	GO:0044030~regulation of DNA methylation	5	0.107158	0.0356357	HELLS, CEBPB, DNMT1, UNGA, POU5F3	3700	7	18136	3.50116	1	0.964466	0.957555
GOTERM_BP_DIRECT	GO:0034501~protein localization to kinetochore	5	0.107158	0.0356357	ZWILCH, TTK, SPDL1, KNL1, AURKB	3700	7	18136	3.50116	1	0.964466	0.957555
GOTERM_BP_DIRECT	GO:0000082~G1/S transition of mitotic cell cycle	9	0.192885	0.0357103	GPR132A, CDK6, GPR132B, CCNE2, CCNE1, CDK2, CDK21, CXCR4A, CDKN1BB	3700	20	18136	2.20573	1	0.964466	0.957555
GOTERM_BP_DIRECT	GO:0043473~pigmentation	13	0.278611	0.0392534	TFAP2A, OCA2, ASIP1, LTK, KITA, MITFA, TYR, SOX10, TYRP1A, ATOH7, LRMDA, ATP6V1H, SLC24A5	3700	35	18136	1.8206	1	1	0.99313
GOTERM_BP_DIRECT	GO:0001878~response to yeast	10	0.214316	0.0404452	CYB5R2, LIMK1A, CEBPB, CCNY, HSPA5, DGAT1B, MCM4, NAP1L1, ATP6V0CA, CYP51	3700	24	18136	2.04234	1	1	0.99313
GOTERM_BP_DIRECT	GO:0016042~lipid catabolic process	24	0.514359	0.041067	LIPEB, PLCH2A, PLCH2B, PLA2G1B, PLA2G4F.1, PLA2G7, OC90, NEU3.5, NEU4, SI:CH73-55I23.1, ZGC:101699, GALCB, NEU1, PLCD4A, PLCE1, PLCD3A, PNPLA4, LIPIA, PNPLA6, PLCD1B, PLCB2, PLA1A, PLA2G4AB, PLCD1A	3700	79	18136	1.4891	1	1	0.99313
GOTERM_BP_DIRECT	GO:0055085~transmembrane transport	136	2.9147	0.0411673	KCNG1, ABCB11B, KCNG2, KCNG3, SLC12A10.2, SLC12A10.1, SLC12A10.3, CACNA1SB, SLC43A2B, ABCA12, SLC47A2.1, MFSD4AA, SLC47A2.2, TMEM266, KCNH1B, SLC2A3B, SLCO2B1, KCNAB2B, SV2BB, KCNAB2A, SLC25A43, SLC2A3A, SLC39A7, SLC39A1, SLC16A4, ABCG8, SLC22A7B.1, SLC30A8, SLC30A2, KCNH7, SI:DKEYP-120H9.1, SLC2A11B, SLC25A23A, SLC43A1A, KCNC1A, MFSD10, KCNH2A, SLC9A5, SLC22A13B, TRPM4B.2, AQP3A, CACNA1BB, AQP1A…	3700	577	18136	1.15532	1	1	0.99313
GOTERM_BP_DIRECT	GO:0042572~retinol metabolic process	8	0.171453	0.0414212	RDH10A, DHRS3B, RDH8B, DHRS9, DHRS3A, ALDH1A2, CYP1B1, RDH8A	3700	17	18136	2.30665	1	1	0.99313
GOTERM_BP_DIRECT	GO:0060348~bone development	8	0.171453	0.0414212	EDAR, BGLAP, CTSK, SULF2A, SPP1, MAFBB, ATP6V1H, OGNA	3700	17	18136	2.30665	1	1	0.99313
GOTERM_BP_DIRECT	GO:0000902~cell morphogenesis	17	0.364338	0.0429823	CDH7A, NEO1A, GPA33A, CDHR5B, RGMA, CDH6, LRATD1, FRYA, CDH1, CDH26.2, CDH26.1, TAGLN2, CXCL12B, CXCR4A, CDH17, CXCL12A, CDH28	3700	51	18136	1.63387	1	1	0.99313
GOTERM_BP_DIRECT	GO:0000724~double-strand break repair via homologous recombination	18	0.385769	0.0431484	SWSAP1, MCM8, RMI1, XRCC2, TONSL, RPA2, MRE11A, PALB2, RAD54B, RAD51AP1, RAD52, RAD51D, RECQL5, RPA3, SWI5, RBBP8, ZSWIM7, AP5S1	3700	55	18136	1.60417	1	1	0.99313
GOTERM_BP_DIRECT	GO:0007268~chemical synaptic transmission	49	1.05015	0.0466792	GABRB3, GLRBA, DLGAP1A, HTR2B, APBA2A, HTR4, SV2BB, PENKB, CHRM4B, CHRNB1, PARIETOPSIN, HTR3A, GABRB2A, APBA1B, HTR1AB, CACNB1, GABRR2B, CACNA1BB, NLGN3A, CACNA1BA, CHRNB1L, PNOCB, CEL.1, CHRM3A, NLGN1, CHRNA5, CACNB3A, CHRNA4B, GRIN1A, NRXN2A, SV2A, CHRNE, CACNA1AA, SLC12A5A, SLC12A5B, PTCHD4, GABRR3A, CHRM2A, SLC17A6B, SI:DKEY-246E3.4, CACNB4B, DLG4B, GABRA6B, DLG2, SYNJ1, OR137-8, OR137-9, CHR…	3700	187	18136	1.28438	1	1	0.99313
GOTERM_BP_DIRECT	GO:0044772~mitotic cell cycle phase transition	9	0.192885	0.0476587	CCNB3, CCNA1, CCNB2, CCNB1, CCNE2, CCNE1, CCNG2, CCNF, CDC6	3700	21	18136	2.10069	1	1	0.99313
GOTERM_BP_DIRECT	GO:0014068~positive regulation of phosphatidylinositol 3-kinase signaling	7	0.150021	0.0477322	PDGFAA, PDGFBB, PDGFAB, ROR1, TEK, HCST, NTRK2B	3700	14	18136	2.45081	1	1	0.99313
GOTERM_BP_DIRECT	GO:0030516~regulation of axon extension	7	0.150021	0.0477322	NET1, DCC, NTN1A, CXCL12A, NTN2, CXCR4B, KIF15	3700	14	18136	2.45081	1	1	0.99313
GOTERM_BP_DIRECT	GO:0001755~neural crest cell migration	30	0.642949	0.0517204	SI:CH211-129C21.1, SEMA3C, SEMA3B, SEMA3H, SEMA3E, FSCN1A, FOXC1B, PDGFAA, SEMA3AB, PARD3AB, ZEB2B, PAX6B, SEMA4GA, NUSAP1, SEMA3GA, PRICKLE1B, PRICKLE1A, TBX1, FOXD3, SEMA6E, SEMA6DL, NRP2A, NRG1, SOX10, SEMA5BA, COL18A1A, SEMA3FA, RADIL, MASP1, CEP41	3700	106	18136	1.38725	1	1	0.99313
GOTERM_BP_DIRECT	GO:0007422~peripheral nervous system development	10	0.214316	0.0521069	TFAP2A, PAX2A, SOX3, FOXD3, NGFB, FGF8A, NTF3, NRG1, SOX10, FGF3	3700	25	18136	1.96065	1	1	0.99313
GOTERM_BP_DIRECT	GO:0031110~regulation of microtubule polymerization or depolymerization	8	0.171453	0.0561855	STMN1A, MAPRE1A, STMN3, STMN4, STMN4L, GAS2L1, SKA3, SKA1	3700	18	18136	2.1785	1	1	0.99313
GOTERM_BP_DIRECT	GO:0055064~chloride ion homeostasis	8	0.171453	0.0561855	SLC12A3, CALCA, SLC12A10.2, CLCNK, SLC12A10.1, SLC12A10.3, SLC12A5A, SLC12A5B	3700	18	18136	2.1785	1	1	0.99313
GOTERM_BP_DIRECT	GO:0033344~cholesterol efflux	8	0.171453	0.0561855	ABCG8, SOAT1, APOEB, APOA1B, ZGC:162608, APOA4B.1, APOA4A, ABCG4B	3700	18	18136	2.1785	1	1	0.99313
GOTERM_BP_DIRECT	GO:0030878~thyroid gland development	8	0.171453	0.0561855	JAG1B, PAX2A, VEGFAA, JAG1A, FGF8A, DUOX, NTN1A, NTN2	3700	18	18136	2.1785	1	1	0.99313
GOTERM_BP_DIRECT	GO:0045930~negative regulation of mitotic cell cycle	8	0.171453	0.0561855	SI:DKEY-79D12.5, BRINP2, BTG2, BRINP1, BRINP3B, CDKN1CA, CDKN1CB, CDKN1BB	3700	18	18136	2.1785	1	1	0.99313
GOTERM_BP_DIRECT	GO:0010862~positive regulation of pathway-restricted SMAD protein phosphorylation	14	0.300043	0.0594281	INHBAA, BMP10, BMP8A, GDF2, INHBB, BMP16, BMP6, BMP5, BMP2A, ACTB1, LFT1, BMP7B, INHBAB, GDF10A	3700	41	18136	1.67372	1	1	0.99313
GOTERM_BP_DIRECT	GO:0034315~regulation of Arp2/3 complex-mediated actin nucleation	5	0.107158	0.0599447	CARMIL2, SI:DKEY-23K10.3, CARMIL3, ARFIP2A, AP1AR	3700	8	18136	3.06351	1	1	0.99313
GOTERM_BP_DIRECT	GO:0035778~pronephric nephron tubule epithelial cell differentiation	5	0.107158	0.0599447	TFAP2A, ETV5A, IRX2A, OSR1, PRKCZ	3700	8	18136	3.06351	1	1	0.99313
GOTERM_BP_DIRECT	GO:0007398~ectoderm development	5	0.107158	0.0599447	AMER2, DKK1B, CDH1, WNT8A, POU5F3	3700	8	18136	3.06351	1	1	0.99313
GOTERM_BP_DIRECT	GO:0034334~adherens junction maintenance	5	0.107158	0.0599447	INAVAB, INAVAA, PRNPB, CDH1, FYNA	3700	8	18136	3.06351	1	1	0.99313
GOTERM_BP_DIRECT	GO:0042573~retinoic acid metabolic process	4	0.0857265	0.0609798	CYP26B1, CYP26C1, ALDH1A2, ALDH8A1	3700	5	18136	3.9213	1	1	0.99313
GOTERM_BP_DIRECT	GO:0086011~membrane repolarization during action potential	4	0.0857265	0.0609798	KCNH2A, KCNH7, KCNE4, KCNH6A	3700	5	18136	3.9213	1	1	0.99313
GOTERM_BP_DIRECT	GO:1900107~regulation of nodal signaling pathway	4	0.0857265	0.0609798	NET1, OSR1, APLNRB, FSCN1A	3700	5	18136	3.9213	1	1	0.99313
GOTERM_BP_DIRECT	GO:0031100~animal organ regeneration	4	0.0857265	0.0609798	TOP2A, WT1A, UHRF1, WT1B	3700	5	18136	3.9213	1	1	0.99313
GOTERM_BP_DIRECT	GO:0021960~anterior commissure morphogenesis	4	0.0857265	0.0609798	NET1, DCC, NTN1A, NTN2	3700	5	18136	3.9213	1	1	0.99313
GOTERM_BP_DIRECT	GO:0008154~actin polymerization or depolymerization	9	0.192885	0.0619296	ENAH, GSNB, CAPGB, SCIN, VASPA, WIPF1A, SCINLA, GSNA, SCINLB	3700	22	18136	2.00521	1	1	0.99313
GOTERM_BP_DIRECT	GO:0032508~DNA duplex unwinding	10	0.214316	0.0657625	PIF1, RECQL5, MCM8, DDX11, MCM3, MCM4, MCM5, MCM6, CHTF18, MCM2	3700	26	18136	1.88524	1	1	0.99313
GOTERM_BP_DIRECT	GO:0014059~regulation of dopamine secretion	10	0.214316	0.0657625	SYT5B, DRD2A, SYT6A, SYT7B, SYT7A, SYT1A, SYT2A, SYT15, SYT11B, SYT9B	3700	26	18136	1.88524	1	1	0.99313
GOTERM_BP_DIRECT	GO:0050852~T cell receptor signaling pathway	10	0.214316	0.0657625	SI:DKEY-169I5.4, SI:DKEY-192G7.3, ZGC:112965, FYNA, ZGC:172120, THEMIS, CD28, ZGC:174863, CD28L, CD276	3700	26	18136	1.88524	1	1	0.99313
GOTERM_BP_DIRECT	GO:0048752~semicircular canal morphogenesis	7	0.150021	0.0662168	JAG1B, TBX1, NCS1A, HNF1BA, LMX1BB, SOX10, ATP1A1A.2	3700	15	18136	2.28742	1	1	0.99313
GOTERM_BP_DIRECT	GO:0070365~hepatocyte differentiation	7	0.150021	0.0662168	SOCS3A, TBX2B, HNF4A, ID2A, PCK1, E2F8, PCK2	3700	15	18136	2.28742	1	1	0.99313
GOTERM_BP_DIRECT	GO:0048263~determination of dorsal identity	7	0.150021	0.0662168	FGF8A, MAPK8B, MAP2K4A, WNT8A, FSTA, EOMESA, BMPR1BA	3700	15	18136	2.28742	1	1	0.99313
GOTERM_BP_DIRECT	GO:0016311~dephosphorylation	35	0.750107	0.0665753	PTPRT, PTPRR, ZGC:153981, DUSP3A, PTPRQ, SI:DKEY-175M17.7, PTPRO, PTPRFA, PTPN20, PTPRFB, PTPRH, STYXL1, DUSP14, ALP3, CA16B, PTPRZ1B, DUSP10, PTPRZ1A, CDC14AB, MTMR1A, ALPI.1, PTPRUA, DUSP13A, PTPRSA, MTMR7A, PTPRN2, DUSP1, PTPREB, DUSP28, ZGC:77752, DUSP6, PTPRNA, PTPRB, ALPL, DUSP22B	3700	130	18136	1.31967	1	1	0.99313
GOTERM_BP_DIRECT	GO:0071277~cellular response to calcium ion	12	0.25718	0.0696919	SYT5B, CPNE4A, CPNE5B, SYT6A, SYT7B, SYT7A, SYT1A, SYT2A, SYT15, CPNE2, SYT11B, SYT9B	3700	34	18136	1.72998	1	1	0.99313
GOTERM_BP_DIRECT	GO:0071526~semaphorin-plexin signaling pathway	15	0.321474	0.0703558	SI:CH211-129C21.1, SEMA3C, SEMA6DL, SEMA6E, SEMA3B, SEMA3H, SEMA3E, MST1RA, SEMA3AB, SEMA5BA, SEMA3FA, SEMA4GA, SEMA3GA, PLXNC1, MET	3700	46	18136	1.59835	1	1	0.99313
GOTERM_BP_DIRECT	GO:0009888~tissue development	13	0.278611	0.0704201	SI:CH211-158D24.2, LAMC3, LAMB4, NTN1A, LAMB2L, NTN2, NET1, NTNG2A, SI:DKEY-220K22.1, NTNG1A, SI:CH211-241E1.3, WNT7BB, WNT7AA	3700	38	18136	1.67687	1	1	0.99313
GOTERM_BP_DIRECT	GO:0098869~cellular oxidant detoxification	8	0.171453	0.0738191	HBBE2, VTG1, HBAE5, HBAA1, PTGS2B, HBBE1.1, HBAE1.3, PRDX6	3700	19	18136	2.06384	1	1	0.99313
GOTERM_BP_DIRECT	GO:0048793~pronephros development	24	0.514359	0.0760382	IQCB1, VEGFAA, NOTCH3, WT1A, PRKCSH, TBX2B, WT1B, OSR1, TBX2A, GREB1L, PTGER2A, PTGER4A, TBX16, CDH6, PAX2A, CFAP298, PKD1A, MECOM, ALDH1A2, CXXC5A, VHL, PTGS2A, CDH17, CCDC40	3700	84	18136	1.40046	1	1	0.99313
GOTERM_BP_DIRECT	GO:0051965~positive regulation of synapse assembly	6	0.12859	0.0778661	SRPX2, EPHB3A, SLITRK2, CLSTN3, SLITRK4, SLITRK6	3700	12	18136	2.45081	1	1	0.99313
GOTERM_BP_DIRECT	GO:0030916~otic vesicle formation	6	0.12859	0.0778661	SOX9A, FGF8A, IGFBP3, HNF1BA, DLX3B, FGF3	3700	12	18136	2.45081	1	1	0.99313
GOTERM_BP_DIRECT	GO:0031623~receptor internalization	6	0.12859	0.0778661	DNM1A, SI:CH73-193I22.1, DNM3A, SI:CH73-334D15.2, DNM1B, FSCN1A	3700	12	18136	2.45081	1	1	0.99313
GOTERM_BP_DIRECT	GO:0001501~skeletal system development	18	0.385769	0.0781027	ACANB, TFAP2A, ACANA, COL5A3A, IGFBP3, MMP14B, COL27A1B, PLOD2, MMP16B, MEOX1, TSHR, FGF3, BCAN, VCANB, COL4A4, COL2A1B, RSPO2, VCANA	3700	59	18136	1.49541	1	1	0.99313
GOTERM_BP_DIRECT	GO:0006006~glucose metabolic process	9	0.192885	0.0785952	G6PD, ADPGK, HKDC1, GAPDHS, PGM2, HK2, GDPGP1, GCK, INS	3700	23	18136	1.91803	1	1	0.99313
GOTERM_BP_DIRECT	GO:0008045~motor neuron axon guidance	17	0.364338	0.0796087	VEGFAA, LAMC3, SEMA3H, RHOH, VEGFC, NTN1A, KCNC3A, NTN2, NRXN2A, NET1, SEMA3AB, RHOGB, CHST11, RAC2, PLS3, NOTUM2, E2F8	3700	55	18136	1.51505	1	1	0.99313
GOTERM_BP_DIRECT	GO:0048488~synaptic vesicle endocytosis	10	0.214316	0.0814681	SYT5B, DNM1A, NLGN1, DNM3A, SYNJ1, SYT1A, SYT2A, DNM1B, NLGN3A, CEL.1	3700	27	18136	1.81542	1	1	0.99313
GOTERM_BP_DIRECT	GO:0050830~defense response to Gram-positive bacterium	15	0.321474	0.0821424	SI:CH211-113A14.19, PGLYRP6, LYGL1, HIST1H2A4, SI:DKEY-108K21.19, HIST1H2A1, HIST1H2A11, HIST1H2A3, HIST1H2A2, HSP90B1, SI:CH211-261N11.8, LYGL2, CD59, SI:CH211-113A14.11, HAMP	3700	47	18136	1.56435	1	1	0.99313
GOTERM_BP_DIRECT	GO:0051321~meiotic cell cycle	13	0.278611	0.0835901	H2AX, PIWIL1, STK35L, TDRD9, MRE11A, MND1, AURKA, STK35, ASZ1, RBBP8, SI:CH211-63O20.7, MNS1, TRIP13	3700	39	18136	1.63387	1	1	0.99313
GOTERM_BP_DIRECT	GO:0043406~positive regulation of MAP kinase activity	7	0.150021	0.088293	PDGFAA, PDGFBB, PIK3R6B, FGFR1A, PDGFAB, KITA, PIK3R5	3700	16	18136	2.14446	1	1	0.99313
GOTERM_BP_DIRECT	GO:0006883~cellular sodium ion homeostasis	7	0.150021	0.088293	ATP1A3A, ATP1A1B, ATP1B1B, ATP1A2A, ATP1A3B, ATP6V1AA, ATP1A1A.2	3700	16	18136	2.14446	1	1	0.99313
GOTERM_BP_DIRECT	GO:0048791~calcium ion-regulated exocytosis of neurotransmitter	7	0.150021	0.088293	SYT5B, SYT7B, SYT7A, SYT1A, SYT2A, RIMS1A, SYT11B	3700	16	18136	2.14446	1	1	0.99313
GOTERM_BP_DIRECT	GO:0019835~cytolysis	7	0.150021	0.088293	PRF1.6, C6, PRF1.2, C9, LYGL2, C8B, PRF1.9	3700	16	18136	2.14446	1	1	0.99313
GOTERM_BP_DIRECT	GO:0048546~digestive tract morphogenesis	7	0.150021	0.088293	DHRS9, PLLP, MYO5B, ALDH1A2, HNF1BA, MYH11A, CLDN15A	3700	16	18136	2.14446	1	1	0.99313
GOTERM_BP_DIRECT	GO:0016358~dendrite development	7	0.150021	0.088293	NET1, DCC, MAP1B, NTN1A, NBEAA, SCARF1, NTN2	3700	16	18136	2.14446	1	1	0.99313
GOTERM_BP_DIRECT	GO:0070509~calcium ion import	7	0.150021	0.088293	CACNA1IA, CACNA1HA, CACNA1FA, SLC4A1B, CACNA1DA, CACNA1SB, CACNA1BA	3700	16	18136	2.14446	1	1	0.99313
GOTERM_BP_DIRECT	GO:1902600~hydrogen ion transmembrane transport	22	0.471496	0.090127	ATP6V1G1, ATP5PD, ATP6V1AA, ATP6AP1B, TCIRG1B, ATP6V1E1B, ATP6V0CA, ATP6V1C1B, TMEM175, ATP6V1BA, ATP1A3A, ATP6V1C1A, ATP6V0A1B, SLC9A5, ATP1A1B, TCIRG1A, ATP1A2A, ATP1A3B, ATP6V1H, NNT2, ATP1A1A.2, ATP6V1F	3700	77	18136	1.40046	1	1	0.99313
GOTERM_BP_DIRECT	GO:1905475~regulation of protein localization to membrane	5	0.107158	0.0909113	GPC6A, GPC2, GPC5B, GPC6B, GPC5A	3700	9	18136	2.72312	1	1	0.99313
GOTERM_BP_DIRECT	GO:0071696~ectodermal placode development	5	0.107158	0.0909113	TFAP2A, PARP3, PNOCB, GATA3, FGF3	3700	9	18136	2.72312	1	1	0.99313
GOTERM_BP_DIRECT	GO:0040036~regulation of fibroblast growth factor receptor signaling pathway	5	0.107158	0.0909113	HSPA8, SPRY4, PTPRO, DUSP6, REREA	3700	9	18136	2.72312	1	1	0.99313
GOTERM_BP_DIRECT	GO:0032868~response to insulin	5	0.107158	0.0909113	SLC2A1A, SLC2A3B, SOCS1A, SLC27A1B, SLC2A3A	3700	9	18136	2.72312	1	1	0.99313
GOTERM_BP_DIRECT	GO:0042795~snRNA transcription from RNA polymerase II promoter	5	0.107158	0.0909113	SNAPC1A, SNAPC4, ELL2, SI:CH73-61D6.3, ZGC:154006	3700	9	18136	2.72312	1	1	0.99313
GOTERM_BP_DIRECT	GO:0006782~protoporphyrinogen IX biosynthetic process	5	0.107158	0.0909113	ALAS1, UROD, HMBSB, CPOX, PPOX	3700	9	18136	2.72312	1	1	0.99313
GOTERM_BP_DIRECT	GO:0097535~lymphoid lineage cell migration into thymus	5	0.107158	0.0909113	CCR9A, CCL25A, CCL25B, CXCL12B, CXCL12A	3700	9	18136	2.72312	1	1	0.99313
GOTERM_BP_DIRECT	GO:0051256~mitotic spindle midzone assembly	5	0.107158	0.0909113	RACGAP1, ZGC:86764, PRC1A, AURKB, PRC1B	3700	9	18136	2.72312	1	1	0.99313
GOTERM_BP_DIRECT	GO:0048846~axon extension involved in axon guidance	5	0.107158	0.0909113	DCC, COL4A5, NTN1A, NTN2, NRXN2A	3700	9	18136	2.72312	1	1	0.99313
GOTERM_BP_DIRECT	GO:0021754~facial nucleus development	5	0.107158	0.0909113	REST, FZD3A, PRICKLE1B, GLI1, CELSR2	3700	9	18136	2.72312	1	1	0.99313
GOTERM_BP_DIRECT	GO:0043697~cell dedifferentiation	5	0.107158	0.0909113	APOBEC2B, CDK6, DKK1B, ID2A, POU5F3	3700	9	18136	2.72312	1	1	0.99313
GOTERM_BP_DIRECT	GO:0035999~tetrahydrofolate interconversion	5	0.107158	0.0909113	MTHFD1A, MTHFD1L, SHMT2, SHMT1, MTHFD2L	3700	9	18136	2.72312	1	1	0.99313
GOTERM_BP_DIRECT	GO:0071678~olfactory bulb axon guidance	5	0.107158	0.0909113	NET1, NPR1B, DCC, NTN1A, NTN2	3700	9	18136	2.72312	1	1	0.99313
GOTERM_BP_DIRECT	GO:0072378~blood coagulation, fibrin clot formation	5	0.107158	0.0909113	FGB, FGA, HPN, FN1B, F13A1A.1	3700	9	18136	2.72312	1	1	0.99313
GOTERM_BP_DIRECT	GO:0001525~angiogenesis	49	1.05015	0.0919233	NTN1A, CLEC14A, CALD1B, KIF11, AMOT, WNT2BB, SOX17, APLNRB, EFNB2A, ITGB8, RSPO1, MEIS1A, CCBE1, FBXW7, NRP2A, BIRC5A, AMOTL2B, SCG2B, PLEKHG5B, VEGFAA, IGFBP2A, NTN2, IGFBP2B, CXCR3.1, PDGFAA, SRPX2, EPHB3A, PDGFAB, VHL, SI:CH73-193I22.1, GDF2, VEGFC, PTK2AB, WNK1B, CXCL8A, IQSEC1B, PLXDC1, TBX4, NRXN3B, TBX16, LPAR2A, DAB2, PTPRB, LPAR2B, SI:CH73-334D15.2, EPHB4A, ALOX5AP, TEK, CEP41	3700	196	18136	1.22541	1	1	0.99313
GOTERM_BP_DIRECT	GO:0036302~atrioventricular canal development	8	0.171453	0.0943392	NPPB, DCHS1B, ADCY2A, ACTC1A, TBX2B, NPPA, ID4, PLCB2	3700	20	18136	1.96065	1	1	0.99313
GOTERM_BP_DIRECT	GO:0017158~regulation of calcium ion-dependent exocytosis	9	0.192885	0.0976703	SYT5B, SYT6A, SYT7B, SYT7A, SYT1A, SYT2A, SYT15, SYT11B, SYT9B	3700	24	18136	1.83811	1	1	0.99313
GOTERM_BP_DIRECT	GO:0010951~negative regulation of endopeptidase activity	13	0.278611	0.0981968	SERPINE3, SERPINC1, SERPINE1, SI:CH211-262H13.5, SERPINH1B, SERPINA1L, SERPINF2A, SI:CH211-284E20.8, KNG1, ZGC:173729, TIMP2B, SERPINB1L1, SERPINB1L2	3700	40	18136	1.59303	1	1	0.99313
GOTERM_BP_DIRECT	GO:0008016~regulation of heart contraction	11	0.235748	0.0996239	VEGFAA, SGO1, GRK3, MELK, GJA3, GRK5, TBX2B, S100A1, KCNH6A, PLEKHA7A, CHRM2A	3700	32	18136	1.68493	1	1	0.99313
GOTERM_BP_DIRECT	GO:0030199~collagen fibril organization	11	0.235748	0.0996239	LOXL5A, COL5A3A, CRTAP, LOXL2A, COL4A4, COL2A1B, SERPINH1B, SI:DKEY-14D8.6, LOXL4, PLOD2, MMP9	3700	32	18136	1.68493	1	1	0.99313
