# Supplementary material for: Forward genetic screen using a gene-breaking trap approach identifies a novel role of grin2bb-associated RNA transcript (grin2bbART) in zebrafish heart function
Source: Front Cell Dev Biol. 2024 Mar 8;12:1339292. doi: 10.3389/fcell.2024.1339292 (PMC10964321; doi:10.3389/fcell.2024.1339292)
Supplement: Supplementary file 18 [file Table7.XLSX]

## Sheet: Sheet1
Category	Term	Count	%	P Value	Genes	List Total	Pop Hits	Pop Total	Fold Enrichment	Bonferroni	Benjamini	FDR
GOTERM_CC_DIRECT	GO:0005615~extracellular space	333	7.13673	1.11845e-17	PRSS1, GLIPR1A, SI:CH211-129C21.1, COL5A2B, SERPINE3, SERPINE1, MMP14B, CCL38.1, SPINT2, SI:DKEY-33M11.8, C4B, NGFB, CBLN18, CTSBA, CTSS1, HABP2, CCL38A.4, SI:CH73-226L13.2, COL5A3A, VEGFBA, SI:CH211-194M7.4, SI:CH211-194M7.8, DKK2, ELFN2A, LINGO4B, BCAN, ACE2, COL18A1A, DKK1B, SFRP5, PLA1A, CFD, CCL39.7, LHB, VMO1A, STC1, TGFA, VMO1B, FGF18B, CCL39.2, CLEC3BB, C6, CLEC3BA, C9, TIMP2B, S100A11, S…	3770	1063	18306	1.52112	6.88965e-15	6.88965e-15	6.72188e-15
GOTERM_CC_DIRECT	GO:0005576~extracellular region	317	6.79383	1.77622e-15	SI:CH1073-280E3.1, SPON1A, GLIPR1A, COL5A2B, APOA4B.1, CCL38.1, HTRA1B, C4B, NGFB, CCN6, CCN5, HMCN2, CCN1, PAPLNB, PAPLNA, CCL38A.4, CCBE1, COL5A3A, DNAAF2, DNAAF4, DKK2, BCAN, ACE2, DKK1B, CRISPLD2, SFRP5, SCG2B, C1QL3A, PLA1A, LHB, STC1, FGF18B, CCL39.2, SI:CH211-284E20.8, GSDF, C6, LCN15, C9, CEP70, ADAMTS17, ARSK, ZGC:195173, COMTA, CRISPLD1A, WNT10A, SPON2B, COL12A1B, RLN3A, GDF2, IGF3, IGF…	3770	1028	18306	1.49733	1.09424e-12	5.47076e-13	5.33754e-13
GOTERM_CC_DIRECT	GO:0005886~plasma membrane	707	15.1522	1.24539e-09	TACR3A, FZD10, CLDN2, HTR4, APBA2A, GRPR, RXFP1, ZGC:158659, ZGC:110353, JAG1B, PREX2, OPN4.1, JAG1A, SPARTA, GJA3, LIMA1A, FNBP1A, ECE2B, SI:CH73-61D6.3, TTYH3B, ENTPD2A.2, CLDNF, CLDNE, SI:CH211-130M23.2, CLDNI, ATP6AP1B, OLFCQ16, APBA1B, ACE2, IRS2A, CDK5R1A, PRKAR1B, TFR2, CAPN2L, ARF4A, AGTR2, CDK5R1B, CLDNA, SLC6A19A.1, SGIP1B, TTYH1, RGS7BPA, EK1, SLC5A2, SI:CH211-204C21.1, NRADD, PRKCZ, G…	3770	2842	18306	1.20795	7.67158e-07	2.55719e-07	2.49493e-07
GOTERM_CC_DIRECT	GO:0031012~extracellular matrix	68	1.45735	1.44745e-07	SPON1A, ECM2, COL5A2B, SI:DKEY-32E6.6, MMP14B, MUC5.2, ZP3C, FGF3, MUC5.1, UCMAA, ADAMTS1, ADAMTSL3, MMP28, CCN6, FBN2A, CCN5, CCN1, PAPLNB, COL5A3A, APOEB, COL10A1B, MMP9, OGNA, SI:CH211-267E7.3, LINGO4B, ELFN2A, BCAN, COL18A1A, VCANB, CCN4A, MMP11B, COL4A4, ZP3D.2, RTN4RL2A, ZP3D.1, MMP19, IGFALS, VCANA, COLEC12, COL11A1B, MMP16B, SI:CH211-67F13.7, MMP20B, LRRC3CA, BGLAP, SI:DKEY-6N6.1, POSTNB,…	3770	179	18306	1.84462	8.9159e-05	2.22907e-05	2.17479e-05
GOTERM_CC_DIRECT	GO:0009897~external side of plasma membrane	77	1.65024	7.62218e-07	ITGA6A, CSF3R, CD248A, IL23R, ZGC:172120, LIFRB, CLEC14A, DICP2.2, CD28L, ZGC:174863, SI:CH73-343L4.8, TFR1B, ZGC:174904, IL12BB, ITGA2.2, RXFP3.3A1, IL13RA2, CMKLR1, IL13RA1, TNFRSF9B, ITGA3B, TNFRSF18, ITGA1, XCR1A.1, LGALS17, SI:DKEY-61F9.1, GFRA3, SI:CH211-214P13.9, SI:DKEY-169I5.4, PRLRA, GFRA2A, SI:CH211-232P21.6, HHLA2A.1, ITGA11A, ITGA8, HHLA2A.2, MHC1LGA, ZGC:194252, CD226, ITGA9, ILLR2,…	3770	219	18306	1.70726	0.000469416	9.39052e-05	9.16186e-05
GOTERM_CC_DIRECT	GO:0016020~membrane	1506	32.276	7.10303e-06	TACR3A, GLIPR1A, GALNT18A, GALNT18B, SPINT2, FZD10, CLDN2, HTR4, ZGC:158659, IM:7151449, SCAMP4, SI:DKEYP-82A1.6, ZGC:174904, LPAR5B, ECE2B, SI:CH73-61D6.3, TTYH3B, ADAM8A, ENTPD2A.2, CLDNF, CLDNE, ZGC:158423, SI:DKEYP-120H9.1, CLDNI, CACNA2D3, OLFCQ16, KCNC1A, TMEM82, SIGIRR, BCR, ELFN2A, CH25H, ACE2, ZFYVE16, ZGC:101744, TFR2, INPPL1B, AGTR2, CLDNA, SLC6A19A.1, ZGC:158432, TTYH1, ABCB4, SGIP1A,…	3770	6751	18306	1.0832	0.00436592	0.000729245	0.000711487
GOTERM_CC_DIRECT	GO:0005694~chromosome	79	1.6931	1.10299e-05	H2AX, ERCC6L, SUV39H1B, SUV39H1A, ZWILCH, MCM8, SI:CH73-368J24.11, TONSL, HIST1H2A5, ZGC:113983, LRMP, ZGC:153405, HIST1H2A6, SETD1BA, HIST1H2A1, SMC4, H1-10, SMC2, ZGC:194989, ZGC:163040, SI:DKEY-108K21.21, SSRP1A, ZGC:171759, NUF2, SI:CH73-368J24.12, OIP5, BANF1, SPDL1, SI:CH1073-153I20.5, ESCO2, TERF1, SMARCAD1A, SGO1, SI:DKEY-108K21.10, SI:DKEY-108K21.11, MCM3, MCM4, DTL, SI:DKEY-261M9.19, SI…	3770	241	18306	1.5917	0.00677143	0.000970632	0.000946996
GOTERM_CC_DIRECT	GO:0009986~cell surface	54	1.15731	5.32841e-05	ROBO2, CD83, CLSTN3, PCSK9, SI:CH211-103F14.3, LTB4R, ITGB8, ITGB7, ITGB6, KISS1RB, PDIA3, ANTXR1B, STRC1, ZGC:153932, GPC5B, GPC5A, PDIA4, SIGIRR, BACE1, NLGN3A, PROM1A, CEL.1, MXRA8A, CD63, NLGN1, NEO1A, GPC6A, WNT8A, GPC6B, LTB4R2A, NRADD, SCUBE2, SCUBE3, SRPX2, SULF2A, ITGB1B.1, GPC2, SI:DKEYP-110A12.4, PROM2, SI:CH211-226H7.5, SI:CH73-193I22.1, ITGB3A, TNFSF13, TMX3A, SULF1, SI:CH211-226H7.3…	3770	155	18306	1.69166	0.032291	0.00410288	0.00400297
GOTERM_CC_DIRECT	GO:0005887~integral component of plasma membrane	217	4.65066	0.000107748	ADGRL2A, SI:CH211-129C21.1, SCN1BA, GRPR, RXFP1, OPN4.1, LPAR5B, GJA3, OLFCB1, PARIETOPSIN, EPHA6, SLC6A17, SLC6A14, CRFB16, PLPPR5B, HTR1AB, ATP2B1B, EPHA4B, CRFB15, TRPM4B.2, SLC6A19A.1, PCDH2AB2, PCDH2AB1, CHRNA4B, PCDH2AB9, EK1, PCDH12, PCDH2AB5, PCDH17, IL22RA2, EPHB3A, SLC16A1B, SLC16A1A, PROM2, TSPAN18A, SI:CABZ01036022.1, SLC6A19B, SI:DKEY-246E3.4, OPN6B, KITA, ADGRB1A, IFNLR1, TRPM1B, PC…	3770	836	18306	1.26039	0.0642213	0.00702276	0.00685176
GOTERM_CC_DIRECT	GO:0045202~synapse	119	2.55036	0.000114006	GLRBA, DLGAP1A, CLSTN3, OBSL1B, ZDHHC2, MYLKB, SCGN, ANK3A, KCNAB2B, SV2BB, KCNAB2A, SYT11B, RGS8, SI:DKEY-174M14.3, SNAP23.2, CHRNB1, PARIETOPSIN, SNAP25B, HTR1AB, BCR, CACNB1, BCAN, VCANB, MAP1B, CPLX3B, CPLX3A, NLGN3A, CACNA1BA, CHRNB1L, RIMS2A, GRID1B, VCANA, UTRN, GRIA3A, GRIA3B, CHRNA5, CACNB3A, CHRNA4B, GRIN1A, LIN7B, SHANK3A, NRXN2A, GRIN2BB, DNM3A, CSPG5A, SLC12A5B, SLC17A6B, DTNA, SI:DK…	3770	419	18306	1.37907	0.0678221	0.00702276	0.00685176
GOTERM_CC_DIRECT	GO:0016459~myosin complex	26	0.557222	0.000165946	MYHA, MYHB, MYLPFA, CGNB, MYO1HB, MYO1HA, MYHZ1.1, MYO6B, MYHC4, MYO1EB, MYO10, MYO15AA, BMF2, MYH11A, MYO9B, MYO16, SMYHC2, MYO1D, MYO3B, MYO5B, MYH7L, MYO3A, MYH7BB, MYO5C, MYH6, MYO1F	3770	60	18306	2.10414	0.097179	0.00929295	0.00906666
GOTERM_CC_DIRECT	GO:0000776~kinetochore	28	0.600086	0.000419874	ERCC6L, ZWILCH, TTK, SKA3, SKA1, NSL1, AURKB, AURKA, NUF2, BUB3, SPDL1, BUB1, CENPT, CENPW, PLK1, LRWD1, KNSTRN, NDC80, SGO1, SI:CH211-161H7.4, CENPH, SI:DKEY-6I22.5, CENPI, CENPO, SPC24, SI:DKEY-225F5.4, MAD2L1, CENPS	3770	70	18306	1.94228	0.227943	0.0215535	0.0210287
GOTERM_CC_DIRECT	GO:0015629~actin cytoskeleton	40	0.857265	0.000482137	PPP1R9ALB, GSNB, INHBAA, ARPC5B, CAPGB, ARPC5A, ABLIM1B, MYO1HA, MYO6B, CALD1B, FSCN1A, LIMD2, SYNPO2LA, ACTB1, SCIN, SYNPO2LB, CFL1L, MYOZ2A, CFL2, CFL1, LIMA1A, MSRB1A, SCINLA, PDLIM7, SCINLB, SI:DKEY-125I10.3, ZNF185, MYO1EB, CNN3B, MYO15AA, TRIOBPA, MYO5B, MYOZ1A, TPMA, MYO5C, MYOZ1B, TAGLN2, GSNA, MYO1F, CORO1CB	3770	114	18306	1.70376	0.257006	0.0227279	0.0221745
GOTERM_CC_DIRECT	GO:0000786~nucleosome	46	0.985855	0.000516543	H2AX, SI:CH211-113A14.19, SI:DKEY-261M9.19, SI:CH211-113A14.18, SI:CH73-368J24.11, ZGC:173552, HIST1H2A5, SI:DKEY-23A13.9, HIST1H2A4, ZGC:113983, ZGC:112234, ZGC:153405, HIST1H2A6, HIST1H2A1, SI:DKEY-261M9.12, H1-10, HIST1H2A3, HIST1H2A2, ZGC:194989, ZGC:163040, PHC2B, ANO9A, SI:DKEY-108K21.21, ZGC:163061, ZGC:171759, SI:CH73-368J24.12, SI:CH211-113A14.24, SI:CH211-113A14.22, ZGC:110425, HIST1H2A…	3770	137	18306	1.63038	0.272596	0.0227279	0.0221745
GOTERM_CC_DIRECT	GO:0005874~microtubule	65	1.39306	0.000753606	KIF14, KIF15, MAP4L, TUBA1C, DNM1A, RASSF1, KIF19, TUBA1A, MID1IP1L, DNM1B, NUSAP1, KIF21A, MID1IP1A, HAUS3, HAUS6, KIF22, DYNLL1, KIF6, TUBB2B, KIF9, KIFC1, MAP1B, KIF2C, KIFC3, KIF20A, CSTPP1, DNAH5, DNAH6, KIF1AA, KIF1AB, ZGC:56231, SKA3, SKA1, AURKA, KIF20BB, KIF20BA, DNM3A, MAP2, LZTS2A, FSD1, KIF26BB, DNAH5L, MAP6A, KIF26BA, MAP9, FGF13A, MAPRE1A, TUBB4B, CENPE, TPX2, MAPTA, TPPP3, KIF18A, …	3770	214	18306	1.47486	0.371486	0.0302309	0.0294948
GOTERM_CC_DIRECT	GO:0005604~basement membrane	23	0.492928	0.000785219	SI:CH211-158D24.2, LAMC3, LAMB4, LAMC2, NTN1A, NTN2, NET1, SI:DKEY-220K22.1, FREM1A, NID1A, LOXL2A, NID2A, COL4A4, SMOC1, SI:CH211-241E1.3, CCDC80L1, HMCN2, COL15A1B, COL14A1A, COL4A5, ANXA2B, ANXA2A, EMID1	3770	55	18306	2.03057	0.383616	0.0302309	0.0294948
GOTERM_CC_DIRECT	GO:0030018~Z disc	27	0.578654	0.00103499	VIMR2, FHL3A, FHL3B, ACTN3A, ACTN3B, FHL5, HSP90AA1.1, SYNPO2LA, CSRP3, PDLIM2, CSRP1B, SYNPO2LB, MYOZ2A, DESMB, PDLIM7, CASQ1B, TRIM63B, CASQ1A, FHL2B, PDLIM3A, LDB3A, LDB3B, MYOZ1A, CASQ2, MYOZ1B, TCAP, ZGC:165653	3770	70	18306	1.87291	0.471591	0.0375032	0.03659
GOTERM_CC_DIRECT	GO:0000775~chromosome, centromeric region	24	0.514359	0.00120492	ERCC6L, SUV39H1B, SUV39H1A, ZWILCH, DSCC1, CDCA8, LRWD1, SKA3, SKA1, NDC80, AURKB, SGO1, CENPF, CENPH, CENPI, MIS18BP1, SI:DKEY-6I22.5, NUF2, CENPK, CENPL, OIP5, SPDL1, CENPO, SPC24	3770	60	18306	1.94228	0.524161	0.0412349	0.0402308
GOTERM_CC_DIRECT	GO:0098552~side of membrane	18	0.385769	0.00190223	CNTN5, GPC5C, GPC6A, GPC5B, NRN1A, GPC6B, GPC5A, RGMA, ALP3, CNTN1A, GFRA2A, HJV, GFRA1A, ALPI.1, DPEP2, GPC2, ALPL, EFNA5A	3770	41	18306	2.13177	0.690529	0.0616723	0.0601706
GOTERM_CC_DIRECT	GO:0000796~condensin complex	6	0.12859	0.00532955	NCAPH2, NCAPG2, NCAPG, NCAPD3, NCAPH, SMC2	3770	7	18306	4.16203	0.962813	0.156958	0.153136
GOTERM_CC_DIRECT	GO:0005871~kinesin complex	20	0.428633	0.00576248	KIF14, KIF1AA, KIF1AB, ZGC:56231, KIF22, KIF6, KIF15, KIF20BB, KIF9, KIF18A, KIF20BA, KIF19, KIFC1, KIF21A, KIF2C, KIF20A, KIF26AA, KIF26BB, KIF26BA, KIF13BB	3770	52	18306	1.86758	0.97156	0.156958	0.153136
GOTERM_CC_DIRECT	GO:0030672~synaptic vesicle membrane	20	0.428633	0.00576248	TMEM163B, SYT5B, SLC17A6B, SYT1A, OTOFA, OTOFB, SYT2A, CLTA, SYN2A, ATP6V0CA, SYN1, SYPA, SYNGR1A, DTNBP1B, SV2A, SV2BB, SLC18A2, VAMP2, SYPB, MCTP1B	3770	52	18306	1.86758	0.97156	0.156958	0.153136
GOTERM_CC_DIRECT	GO:0043005~neuron projection	73	1.56451	0.00586045	GABRB3, ADGRL2A, ROBO2, PCSK2, GLRBA, TENM1, PCSK1, NRSN1, PTGS2B, TENM4, STMN3, STMN4, ROBO1, MAP4L, SCGN, ZGC:77784, LIMK1A, STMN1A, KCNAB2B, SV2BB, KCNAB2A, KCNN1A, KCNN1B, SNAP23.2, RGS6, CHRNB1, EPHA6, CPEB1A, CAMK2D2, IGSF9BB, HTR3A, GABRB2A, DNAAF4, OPRM1, SNAP25B, EPHA4B, GABRR2B, CACNA1FA, RGS9BP, CHRNB1L, STMN4L, TPH2, PLPPR1, CHRNA5, CAMK2A, RGS7BPA, CHRNA4B, EK1, GRIN1A, ADCYAP1R1A, C…	3770	265	18306	1.33761	0.973235	0.156958	0.153136
GOTERM_CC_DIRECT	GO:0005891~voltage-gated calcium channel complex	15	0.321474	0.00682736	CACNA2D2A, CACNB4B, CACNB3A, STAC3, CACNA2D3, CACNA1SB, CACNG6B, CACNA1IA, CACNB1, CACNA1HA, CACNA1DA, CACNA1AA, CACNA1BB, CACHD1, CACNA1BA	3770	35	18306	2.08102	0.985303	0.175236	0.170969
GOTERM_CC_DIRECT	GO:0043020~NADPH oxidase complex	6	0.12859	0.0118054	NCF1, NCF2, CYBB, DUOX, CYBA, NOX1	3770	8	18306	3.64178	0.999335	0.290885	0.283802
GOTERM_CC_DIRECT	GO:0005579~membrane attack complex	7	0.150021	0.0134365	C6, PRF1.2, C9, C7A, C8B, C7B, PRF1.9	3770	11	18306	3.08999	0.99976	0.313742	0.306102
GOTERM_CC_DIRECT	GO:0001725~stress fiber	14	0.300043	0.0137517	LIMCH1B, LIMCH1A, FHL3A, FHL3B, ABLIM1B, PDLIM3A, PDLIM2, LDB3A, LDB3B, XIRP1, ZYX, GAS2L1, ZGC:165653, PDLIM7	3770	34	18306	1.99941	0.999803	0.313742	0.306102
GOTERM_CC_DIRECT	GO:0000307~cyclin-dependent protein kinase holoenzyme complex	13	0.278611	0.0158647	CCNF, CKS1B, CCNB3, CCNA1, CCNB2, CCNB1, CDK6, CCNE2, CCNE1, CCNG2, CDK2, CKS2, CDK21	3770	31	18306	2.03626	0.999947	0.349024	0.340525
GOTERM_CC_DIRECT	GO:0030424~axon	50	1.07158	0.0175538	ADGRL2A, RET, SCN1BA, NGFB, KCNAB2B, KCNAB2A, KIF21A, EMB, SYT11B, SYT7B, SYT7A, PLEKHG6, ALCAMB, VSTM2L, NRP2A, OPRM1, KCNC1A, BCR, BACE1, MYOT, FEZ1, PLEKHG5B, DSCAML1, SLC5A7A, HCN4, SLC8A4A, SYT2A, SEMA3H, KIF1AA, KCNA4, KIF1AB, PCLOA, SEMA3AB, ATOH7, CNTN1A, L1CAMA, HCN2B, NTF3, NCAM3, L1CAMB, NFASCA, SYT5B, SYT1A, KCNC3A, NTRK2A, NTRK2B, SLC8A3, DLG2, NPTNA, NCAM1B	3770	179	18306	1.35634	0.999982	0.372866	0.363786
GOTERM_CC_DIRECT	GO:0032432~actin filament bundle	6	0.12859	0.0220929	RFLNB, PLS3, MARCKSA, LCP1, PLS1, RFLNA	3770	9	18306	3.23714	0.999999	0.442116	0.43135
GOTERM_CC_DIRECT	GO:0043240~Fanconi anaemia nuclear complex	7	0.150021	0.0222493	FANCL, FAAP24, FANCB, SI:CH73-70K4.1, FANCG, FANCF, CENPS	3770	12	18306	2.83249	0.999999	0.442116	0.43135
GOTERM_CC_DIRECT	GO:0008305~integrin complex	13	0.278611	0.0266278	ITGAE.2, ITGA6A, ITGB3A, ITGA3B, ITGA1, ITGA2.2, ITGA11A, ITGA8, ITGB1B.1, ITGBL1, ITGB8, ITGB7, ITGA9	3770	33	18306	1.91285	1	0.506506	0.494172
GOTERM_CC_DIRECT	GO:0038039~G-protein coupled receptor heterodimeric complex	4	0.0857265	0.0295046	GABBR2, GPR156, GABBR1A, GABBR1B	3770	4	18306	4.8557	1	0.506506	0.494172
GOTERM_CC_DIRECT	GO:0005658~alpha DNA polymerase:primase complex	4	0.0857265	0.0295046	PRIM2, POLA1, POLA2, PRIM1	3770	4	18306	4.8557	1	0.506506	0.494172
GOTERM_CC_DIRECT	GO:0000811~GINS complex	4	0.0857265	0.0295046	GINS1, GINS2, GINS3, GINS4	3770	4	18306	4.8557	1	0.506506	0.494172
GOTERM_CC_DIRECT	GO:0016324~apical plasma membrane	35	0.750107	0.029601	ACTC1B, RIPOR2, ASAH2, SLC44A4, SLC12A10.2, MARVELD2B, SLC12A10.1, SLC12A10.3, ATP6V1AA, SLC5A12, SLC47A2.1, RHCGB, DPP4, PARD3AB, OCLNA, SLC2A1A, SLC3A2B, SLC2A3B, CTSK, DUOX, SLC2A3A, SI:DKEYP-110A12.4, PROM2, SI:CH211-226H7.5, ABCC4, SLC12A3, ZGC:158423, ABCC2, ZGC:153932, ZGC:91968, SLC39A10, ATP6V1BA, SI:CH211-226H7.3, ACE2, PROM1A	3770	121	18306	1.40454	1	0.506506	0.494172
GOTERM_CC_DIRECT	GO:0033180~proton-transporting V-type ATPase, V1 domain	6	0.12859	0.036801	ATP6V1C1A, ATP6V1AA, ATP6AP1B, ATP6V1C1B, ATP6V1F, ATP6V1BA	3770	10	18306	2.91342	1	0.55296	0.539495
GOTERM_CC_DIRECT	GO:0042555~MCM complex	6	0.12859	0.036801	MCM8, MCM3, MCM4, MCM5, MCM6, MCM2	3770	10	18306	2.91342	1	0.55296	0.539495
GOTERM_CC_DIRECT	GO:0032426~stereocilium tip	5	0.107158	0.0368041	MYO3B, STRC1, MYO3A, WHRNB, WHRNA	3770	7	18306	3.46836	1	0.55296	0.539495
GOTERM_CC_DIRECT	GO:0032983~kainate selective glutamate receptor complex	5	0.107158	0.0368041	GRIK1B, GRIK5, GRIK3, GRIK4, SI:CH211-251B21.1	3770	7	18306	3.46836	1	0.55296	0.539495
GOTERM_CC_DIRECT	GO:0005664~nuclear origin of replication recognition complex	5	0.107158	0.0368041	ORC5, ORC4, ORC6, ORC3, LRWD1	3770	7	18306	3.46836	1	0.55296	0.539495
GOTERM_CC_DIRECT	GO:0072686~mitotic spindle	12	0.25718	0.0395426	TPX2, ESPL1, CDC14AB, KIFC1, CKAP2L, NUSAP1, HAUS3, LRMP, KIF11, KNSTRN, SKA1, MAP9	3770	31	18306	1.87963	1	0.567572	0.553751
GOTERM_CC_DIRECT	GO:0008076~voltage-gated potassium channel complex	18	0.385769	0.0396194	KCNG1, KCNQ1.1, KCNG2, KCNG3, KCND2, KCNA4, KCNC3A, KCNA1B, KCNA7, DPP6A, KCNC1A, KCNF1B, DPP6B, KCNAB2B, KCNMB2, KCNQ2A, KCNIP1B, KCNV2A	3770	54	18306	1.61857	1	0.567572	0.553751
GOTERM_CC_DIRECT	GO:0070382~exocytic vesicle	11	0.235748	0.0465515	SYT5B, SYTL2B, SYT6A, SYT7B, SYT1A, SYT2A, SYT15, SYT11B, SYT9B, SI:CH211-266G18.6, UNC13D	3770	28	18306	1.9076	1	0.651721	0.635852
GOTERM_CC_DIRECT	GO:0046658~anchored component of plasma membrane	9	0.192885	0.0500765	EEPD1, HJV, GPC6A, GPC2, GPC5B, GPC6B, GPC5A, NRN1A, RGMA	3770	21	18306	2.08102	1	0.670589	0.65426
GOTERM_CC_DIRECT	GO:0032982~myosin filament	9	0.192885	0.0500765	SMYHC2, MYHA, MYHB, MYH7L, MYH7BB, MYH11A, MYHZ1.1, MYHC4, MYH6	3770	21	18306	2.08102	1	0.670589	0.65426
GOTERM_CC_DIRECT	GO:0031941~filamentous actin	8	0.171453	0.05874	PDLIM2, LDB3A, LDB3B, PDLIM3A, SMTNL, PDLIM7, SPECC1LB, SMTNL1	3770	18	18306	2.15809	1	0.753878	0.735521
GOTERM_CC_DIRECT	GO:0043235~receptor complex	40	0.857265	0.0587438	DDR1, RET, GPR37A, FGFR1A, LTK, CSF3R, PTPRQ, IL23R, LIFRB, EK1, KCTD12.1, BMPR1BA, IL12BB, EPHB3A, GFRA1A, SI:CH211-112C15.8, GPRC5BB, IL13RA2, IL13RA1, ABCG8, SI:CH73-193I22.1, EPHA6, KITA, GFRA3, NTRK2A, TNFRSF1A, NTRK2B, MST1RA, PTPRB, SI:CH73-334D15.2, PRLRA, EPHA4B, EPHB4A, GFRA2A, ACVR1BB, ROR1, ERBB3A, TEK, FGFR3, MET	3770	149	18306	1.30354	1	0.753878	0.735521
GOTERM_CC_DIRECT	GO:0034361~very-low-density lipoprotein particle	5	0.107158	0.0618028	APOBB.1, APOBB.2, APOEB, APOBA, VLDLR	3770	8	18306	3.03481	1	0.755104	0.736717
GOTERM_CC_DIRECT	GO:0033018~sarcoplasmic reticulum lumen	4	0.0857265	0.0625168	CASQ1B, CASQ1A, CALUA, CASQ2	3770	5	18306	3.88456	1	0.755104	0.736717
GOTERM_CC_DIRECT	GO:0034362~low-density lipoprotein particle	4	0.0857265	0.0625168	APOBB.1, APOBB.2, APOEB, APOBA	3770	5	18306	3.88456	1	0.755104	0.736717
GOTERM_CC_DIRECT	GO:0000164~protein phosphatase type 1 complex	7	0.150021	0.0688755	PPP1R15A, PPP1R15B, PPP1R3DA, PPP1R3B, PPP1R3CA, PPP1R3AA, PPP1R3AB	3770	15	18306	2.26599	1	0.811564	0.791802
GOTERM_CC_DIRECT	GO:0005581~collagen trimer	21	0.450064	0.0698261	SI:CH211-106N13.3, COLEC12, CCBE1, COL5A3A, COL12A1B, COL5A2B, COL22A1, COL11A1B, COL10A1B, COL27A1B, PLOD2, COL28A2A, CTHRC1A, COL18A1A, COL6A2, COL4A4, COL2A1B, COL15A1B, COL14A1A, COL4A5, COL17A1B	3770	70	18306	1.45671	1	0.811564	0.791802
GOTERM_CC_DIRECT	GO:0005884~actin filament	17	0.364338	0.0740471	INHBAA, WIPF1A, WIPF2B, INHBB, MYO9B, GAS2B, ACTB1, DIAPH3, TPMA, COTL1, PLS3, HCLS1, TWF2B, TWF1A, LCP1, GAS2L1, PLS1	3770	54	18306	1.52865	1	0.825977	0.805864
GOTERM_CC_DIRECT	GO:0031234~extrinsic component of cytoplasmic side of plasma membrane	13	0.278611	0.0747372	SRMS, TNK2B, FYNA, STAC3, PTK2AB, PTK2BB, STYK1B, ZAP70, SI:CH73-206D17.1, LCK, KCNAB2B, RGS8, GRAMD2AA	3770	38	18306	1.66116	1	0.825977	0.805864
GOTERM_CC_DIRECT	GO:0045121~membrane raft	15	0.321474	0.0750888	ACTC1B, RET, KCNQ1.1, CBLC, DICP3.1, DICP2.2, DICP1.1, TNFRSF1A, DPP4, BACE1, BACE2, SI:CH211-112C15.8, FAS, LAMTOR1, PAG1	3770	46	18306	1.58338	1	0.825977	0.805864
GOTERM_CC_DIRECT	GO:0005657~replication fork	6	0.12859	0.0805729	PIF1, RAD51D, UHRF1, RADX, XRCC2, PRIMPOL	3770	12	18306	2.42785	1	0.855739	0.834902
GOTERM_CC_DIRECT	GO:0048787~presynaptic active zone membrane	6	0.12859	0.0805729	STX11A, OTOFA, OTOFB, STX3A, STX2B, STX1A	3770	12	18306	2.42785	1	0.855739	0.834902
GOTERM_CC_DIRECT	GO:0045211~postsynaptic membrane	38	0.814402	0.0876461	GABRB3, GLRBA, SHISA8B, CHRNA5, CLSTN3, GRIK5, CHRNA4B, GRIK3, GRIK4, KCTD12.1, SI:CH211-251B21.1, GRIN1A, SHANK3A, KCNMA1A, GRIN3BA, GRIN2BB, CHRNE, GABRR3A, GRIA4B, CHRM2A, CHRM4B, CHRNB1, KCND2, HTR3A, GABRB2A, KCNC3A, KCNC1A, GABRA6B, GRIK1B, GABRR2B, GRID1B, CHRNB1L, UTRN, GRIA3A, CHRM5B, GPHNB, CHRM3A, GRIA3B	3770	145	18306	1.27253	1	0.915085	0.892802
GOTERM_CC_DIRECT	GO:0051233~spindle midzone	7	0.150021	0.0916757	UNC119B, RACGAP1, MAPRE1A, CDCA8, UNC119.2, AURKB, AURKA	3770	16	18306	2.12437	1	0.941204	0.918285
GOTERM_CC_DIRECT	GO:0031045~dense core granule	5	0.107158	0.0935708	SYT5B, SYT1A, SYT2A, SPX, SYT9B	3770	9	18306	2.69761	1	0.944912	0.921902
